# Supplementary material for: Ectopic expression of the transcription factor ONECUT3 drives a complex karyotype in myelodysplastic syndromes
Source: JCI journal article supplement (doi:10.1172/jci172468), 2024-02-22
Supplement: sd1 [file 1]

**List of Supplemental Information for ‘Ectopic expression of transcription factor ONECUT3 drives complex karyotype in Myelodysplastic Syndromes’**

1  
2  
3  
4  
5  
6  
7  
8  
9  
10  
11  
12  
13  
14  
15  
16  
17  
18  
19  
20  
21  
22  
23  
24  
25  
26

**Supplemental Figure Legends and Figures ..... P2-20**  
**Supplemental Tables..... P21-35**  
**Supplemental Material and Methods..... P36-47**  
**Supplemental References..... P47**

Fig. S1

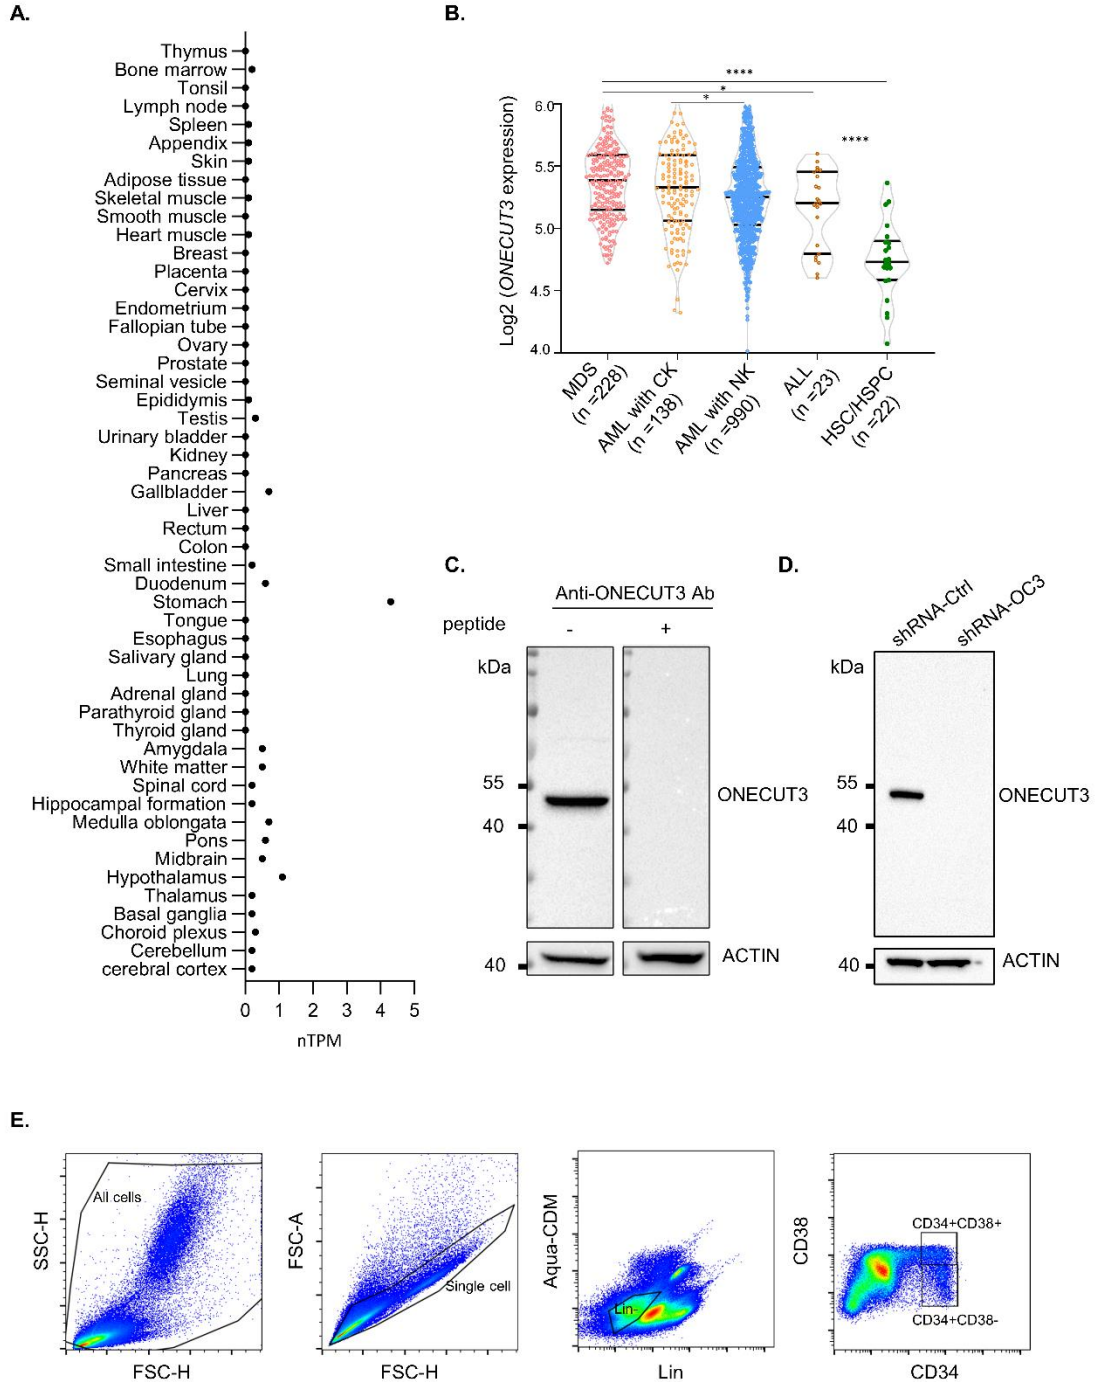

32 **A.** The data is based on HPA RNA-seq tissue data from the Human Protein Atlas version 22.0.  
33 nTPM (normalized protein-coding transcripts per million), corresponds to the mean values of the  
34 different individual samples from each tissue. **B.** The expression of *ONECUT3* was generated  
35 from the dataset of GSE13159, GSE15434, GSE61804, GSE14468, and The Cancer Genome  
36 Atlas (TCGA). Data has been batch corrected. AML with CK contains: AML with Complex, AML  
37 with Complex +other and AML with Complex+5q. HSC/ HSPC includes Hematopoietic stem cell  
38 (HSC), Multipotential progenitors (MPP), Common myeloid progenitor cell (CMP), Granulocyte  
39 monocyte progenitors (GMP), Megakaryocyte-erythroid progenitor cell (MEP). **C-D.** The  
40 validation of newly generated anti-ONECUT3 antibody. The cell lysate of the bone marrow (BM)  
41 mononuclear cells from one patient of complex karyotype was used for immunoblotting. 1  $\mu$ g  
42 homemade antibody (rabbit anti-human ONECUT3 antibody) was not blocked [(-) blocking  
43 peptide] and another 1  $\mu$ g antibody that pre-incubated with the peptide [(+) 1  $\mu$ g blocking peptide  
44 (aa 469-482)] for overnight (C). HEK293 cells were transiently transfected with pLKO-TET-  
45 ONECUT3. In addition, the cell lysate from ShRNA-Ctrl (-Dox) or shRNA-ONECUT3 (+Dox) for  
46 the immunoblotting was also performed to confirm the specificity of the rabbit anti-ONECUT3  
47 polyclonal antibody (D). Loading control is ACTIN. **E.** Gating strategy for Lin<sup>-</sup>CD34<sup>+</sup>CD38<sup>-</sup> stem  
48 cells and Lin<sup>-</sup>CD34<sup>+</sup>CD38<sup>+</sup> progenitor cells from volunteers and patients with MDS in Figure 1 F.  
49



55 cassette flanked by homology sequences (gray lines and boxes) to *CCR5*; right, sequence of  
56 ssODN of PGK-EGFP-ONECUT3-SV40 polyA cassette flanked by homology sequences. Gray-  
57 highlighted parts were homology sequences targeted *CCR5* exon3. The full-length of *ONECUT3*  
58 gene was underlined. **B.** Targeted integration of the indicated EGFP-ONECUT3 expression  
59 cassettes relative to wide-type and- EGFP+ hematopoietic stem/progenitor cells (HSPCs). The  
60 genotypes of control and ONECUT3-KI HSPCs were depicted by PCR. Ctrl: No band detected at  
61 646 bp; ONECUT3-KI: band detected at 646 bp. **C.** Flow cytometry data showing EGFP+ cells 4  
62 days after transduction with or without EGFP-ONECUT3 expressing. Two histograms showed the  
63 EGFP MFI (left) and SSC MFI (right) of control HSPC (gray) and EGFP+ HSPCs (red color). **D.**  
64 Morphology of MOLM13 cells after the eight days of Doxycycline induction was conducted via  
65 cytopsin, followed by Wright-Giemsa staining. Left, the representative figures; red arrows indicate  
66 the multinucleated cell; right, comparative analysis of multinucleated cell percentage in control (-  
67 Dox) and ONECUT3-OE (+Dox) on MOLM13 cells; n=3. **E.** Cell growth was shown in the  
68 absence (control) or presence (ONECUT3-OE) of Doxycycline. The cell number was counted  
69 every two days. **F.** CFU-assay in methylcellulose after ONECUT3-OE or control in MOLM13 for  
70 14 d. Left, the comparative analysis of CFU colony number; right, representative colonies are  
71 shown. **G.** HL-60 R-band chromosome analysis. The percentage of double minutes in 10  
72 metaphases in control and ONECUT3-OE. Scale bar, 10  $\mu$ m (D), 100 mm (F). Statistical analysis  
73 was performed using a two-tailed paired Student t-test (D, F, and G); n. s. not significant, \*P  
74 <0.05, \*\*P <0.01.

75

76

**Fig. S3**

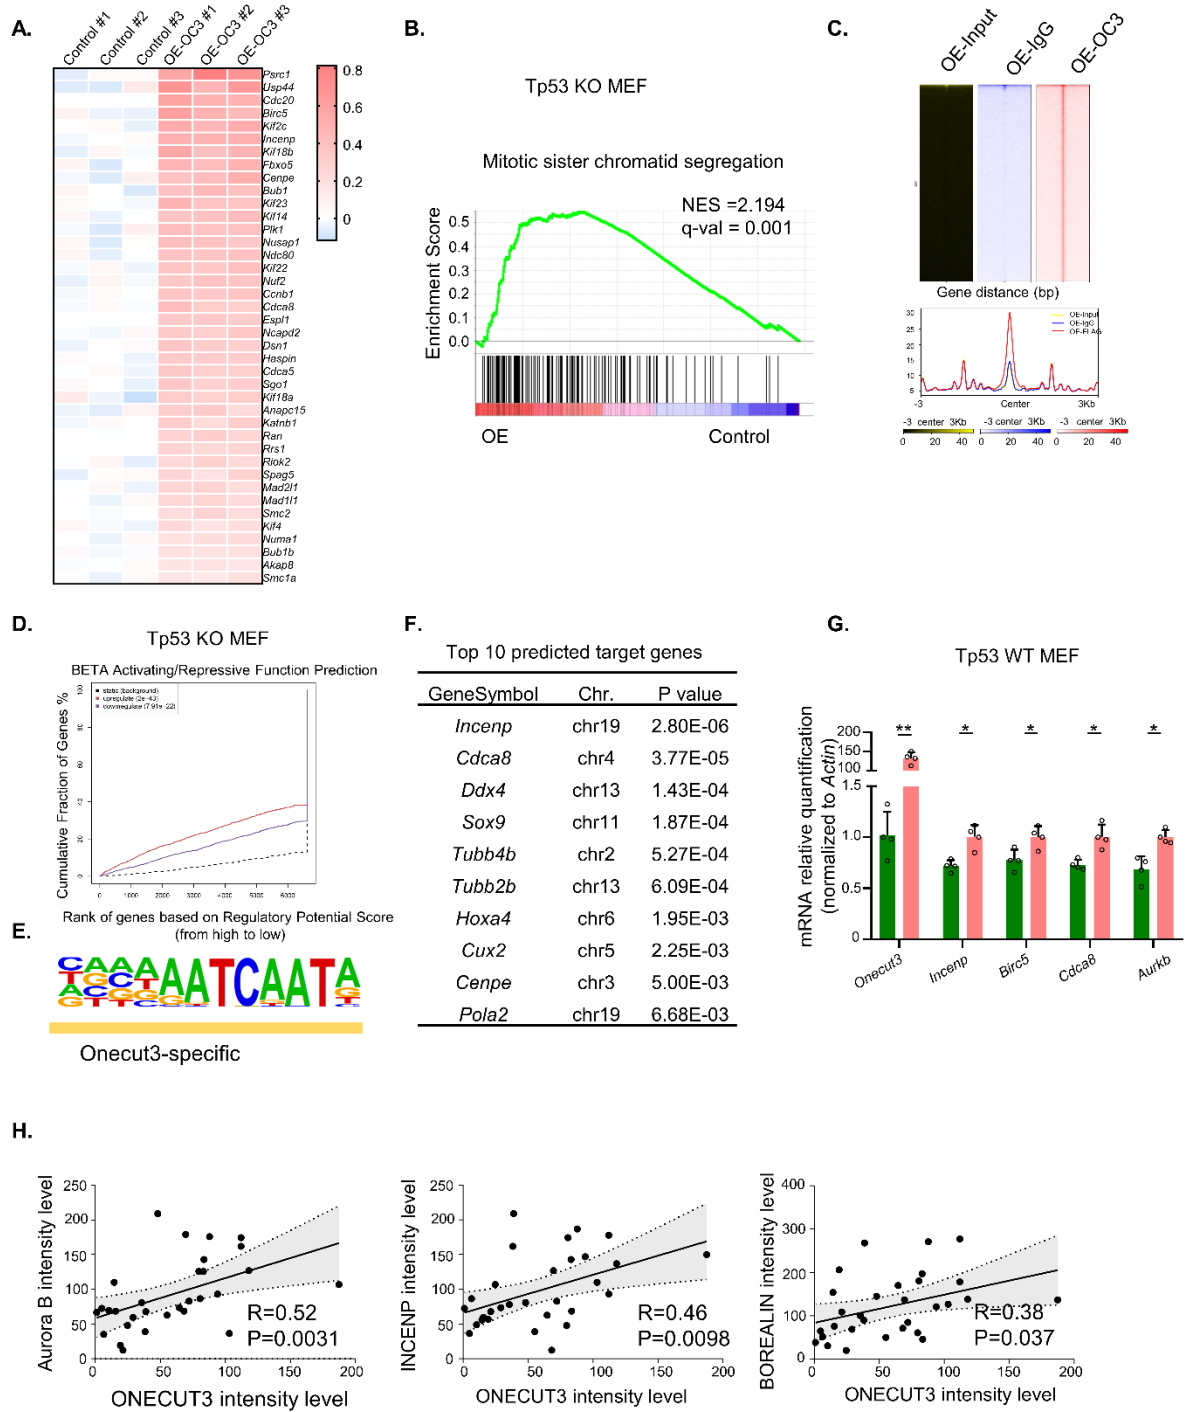

77

78 **Supplemental Figure 3 (Related to Figure 3). ONECUT3 activates Chromosomal Passenger**  
 79 **Complex components INCENP and CDCA8 through direct DNA binding.**

80 **A.** RNA-seq was conducted on the sample collected after 48 h of Doxycycline (100 ng ml<sup>-1</sup>)  
 81 induction (Onecut3-OE) compared to without Doxycycline induction (control) in Tp53-KO MEF.

82 The heatmap showed the top 40 leading-edge genes from the GSEA of Onecut3-OE-induced  
83 genes. Expression values are represented as colors (pink-high, white-moderate, light blue-low).  
84 **B.** GSEA plot showing the ranked Onecut3-OE-induced genes in Tp53-KO MEF (related to  
85 Figure 3A). **C.** Distribution map of Onecut3 binding loci in ChIP-seq. **D.** BETA suit found Onecut3  
86 in Tp53-KO MEF had both activating and repressing functions, while it dominated to activate  
87 other genes. **E.** Top binding motif in Onecut3-specific peaks. **F.** The integrative assays of RNA-  
88 seq and ChIP-seq were conducted by Binding and Expression Target Analysis (BETA). The top  
89 10 predicted target genes are listed in the table. **G.** The enrichment of *Incnp* and *Cdca8* was  
90 found upon Onecut3-OE via quantitative PCR analysis in Tp53-WT MEF. **H.** The correlation of  
91 the IHC intensity level (H-Score) of ONECUT3 and Aurora B, INCENP or Borealin/CDCA5 in  
92 MDS biopsy tissue. The black line represents the regression curve derived from Pearson  
93 correlation analysis. The shaded area in the plot indicates the confidence interval (95%).  
94 Statistical analysis was performed using a two-tailed paired Student t-test (G.) or Pearson  
95 correlation tests (H.); n. s. not significant, \*P <0.05, \*\*P <0.01.

96

97

**Fig. S4**

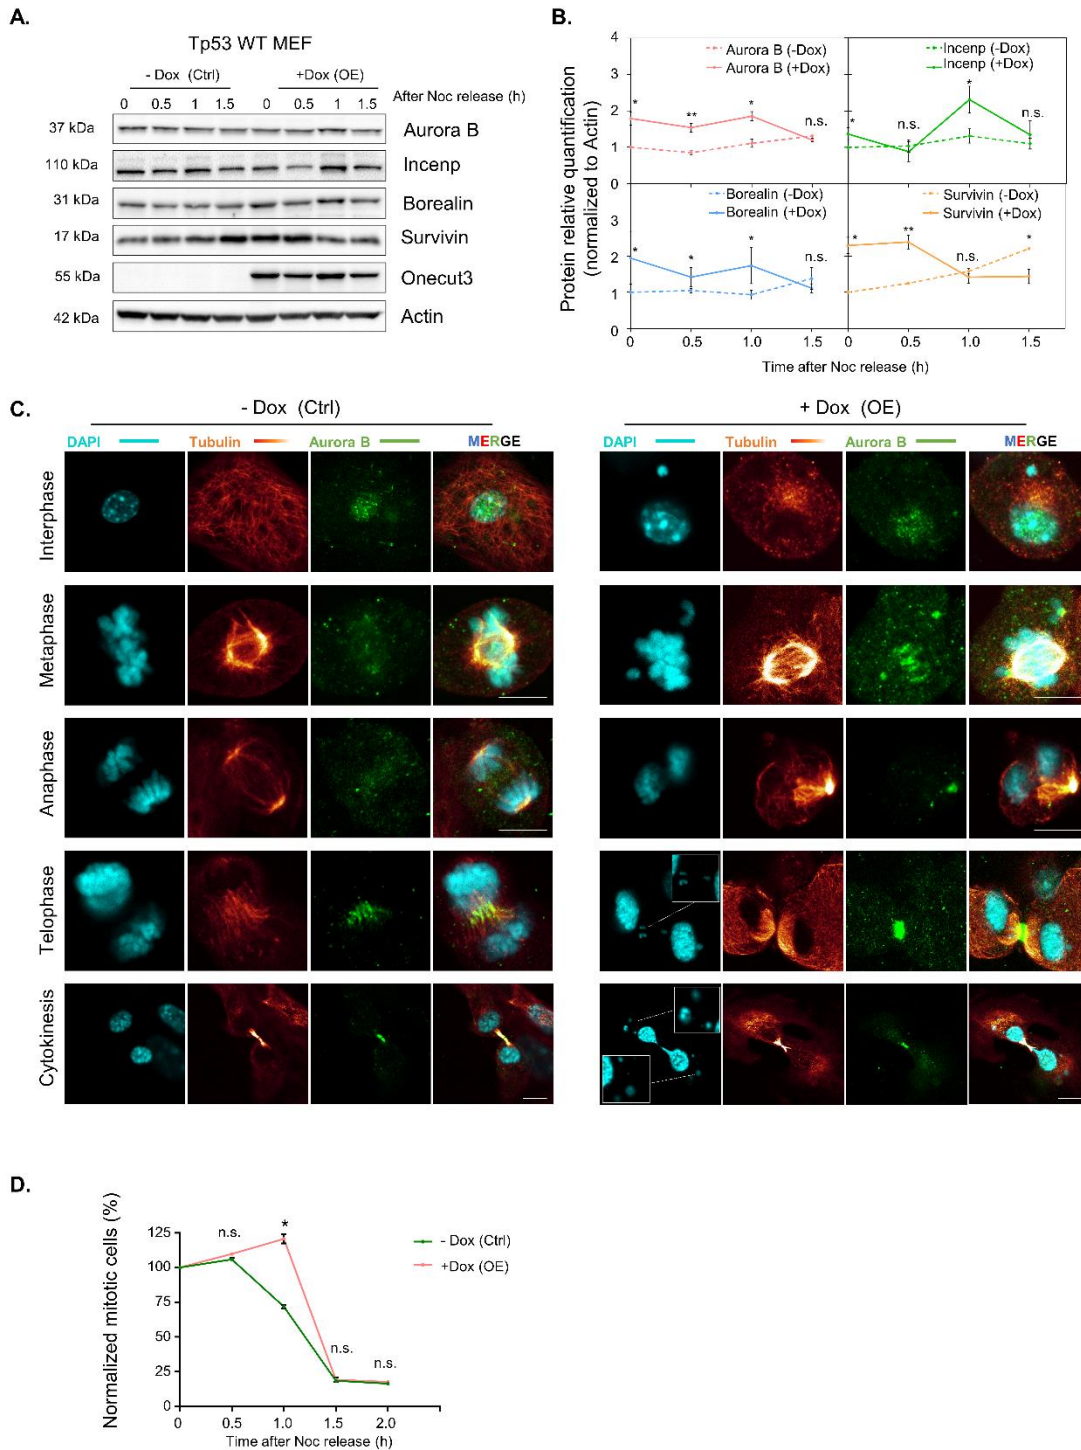

98

99 **Supplemental Figure 4 (Related to Figure 4). Overexpression of ONECUT3 leads to**  
 100 **dysregulation of Chromosomal Passenger Complex and mitotic defects.**

101 **A.** Time course of Western blot analysis of CPC components. The control (-Dox) and Onecut3-  
 102 OE (+Dox) on Tp53-WT MEF were treated with Nocodazole (75 ng ml<sup>-1</sup>) for 15 hours, and



103 Nocodazole was washed out at the indicated time points. These cell lysates were then harvested  
104 for immunoblotting against the antibodies of CPC components (Incenp, Borealin, Survivin, and  
105 Aurora B). **B.** The comparative analysis of total protein levels at the indicated time points of  
106 nocodazole release: grey values were analyzed using ImageJ, and the ratio to Actin as a  
107 percentage was calculated relative to  $t = 0$  for each time point. **C.** Representative confocal  
108 images of the co-immunostaining against DAPI (blue), Tubulin (yellow), and Aurora B (green) in  
109 each mitotic phase. **D.** After the nocodazole release, cells were fixed, and the fraction of mitotic  
110 cells was determined by FACS according to phospho-histone H3 staining and normalized to  $t = 0$   
111 h for each time point. Percentage control vs. Onecut3-OE is indicated.  
112

**Fig. S5**

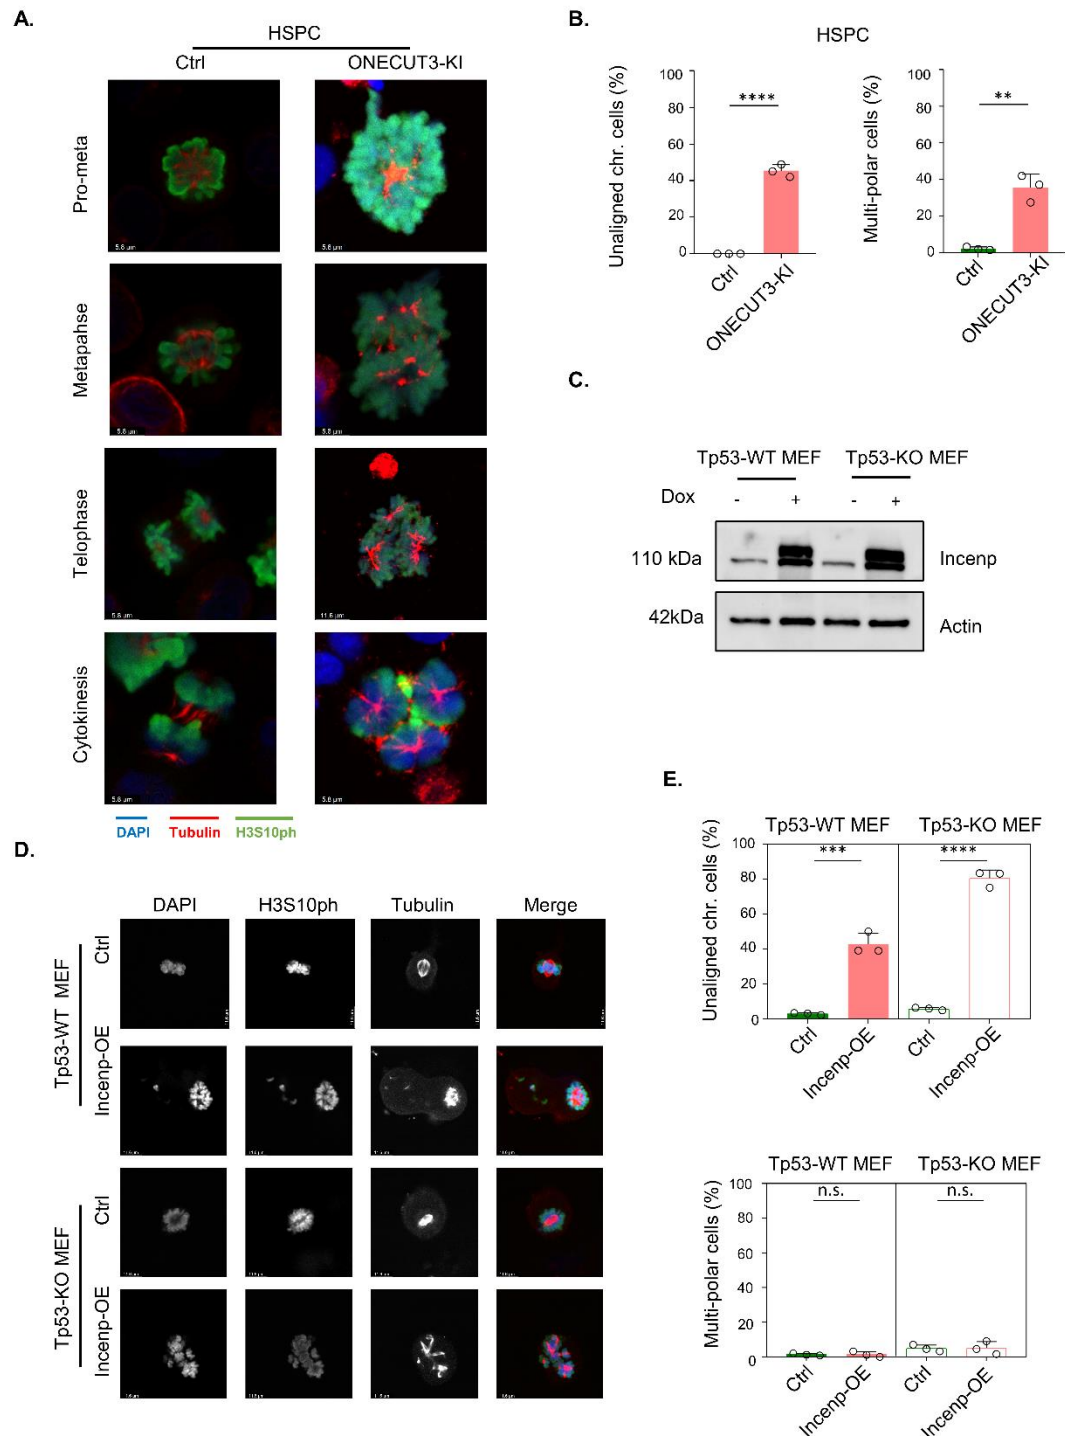

113

114 **Supplemental Figure 5 (Related to Figure 4). Overexpression of ONECUT3 leads to the**  
 115 **mitotic defect through the misexpression of CPC components.**

116 **A.** The confocal was conducted after 7 days in HSPC and 15 hours of nocodazole treatment  
 117 followed by PBS washout. The representative co-immunostaining image against DAPI (blue),

118 H3S10ph (green) and Tubulin (red) in each mitotic phase. **B.** The percentage of unaligned  
119 chromosomes and multi-polar cells in control and ONECUT3-KI HSPC were counted; n=3. **C.**  
120 The cell lysates were harvested after the treatment with or without 48h Doxycycline (100 ng ml<sup>-1</sup>)  
121 to induce Incenp over-expression in Tp53-WT and Tp53-KO MEF and were blotted against anti-  
122 Incenp antibodies. Loading control is Actin. **D.** The representative co-immunostaining image  
123 against DAPI (blue), H3S10ph (green) and Tubulin (red) of control or Incenp-OE in Tp53-WT and  
124 Tp53-KO MEF. **E.** The frequencies of unaligned chromosomes and multi-polar cells were  
125 quantified in control and Incenp-overexpressing (Incenp-OE) cells derived from Tp53-WT and  
126 Tp53-KO MEF; n=3. Scale bar, 5.8  $\mu$ m (A.) and 11.6  $\mu$ m (D). Statistical analysis was performed  
127 using a two-tailed paired Student t-test (B and E); n. s. not significant, \*P <0.05, \*\*P <0.01, \*\*\* P  
128 <0.001, \*\*\*\* P <0.0001.

129

**Fig. S6**

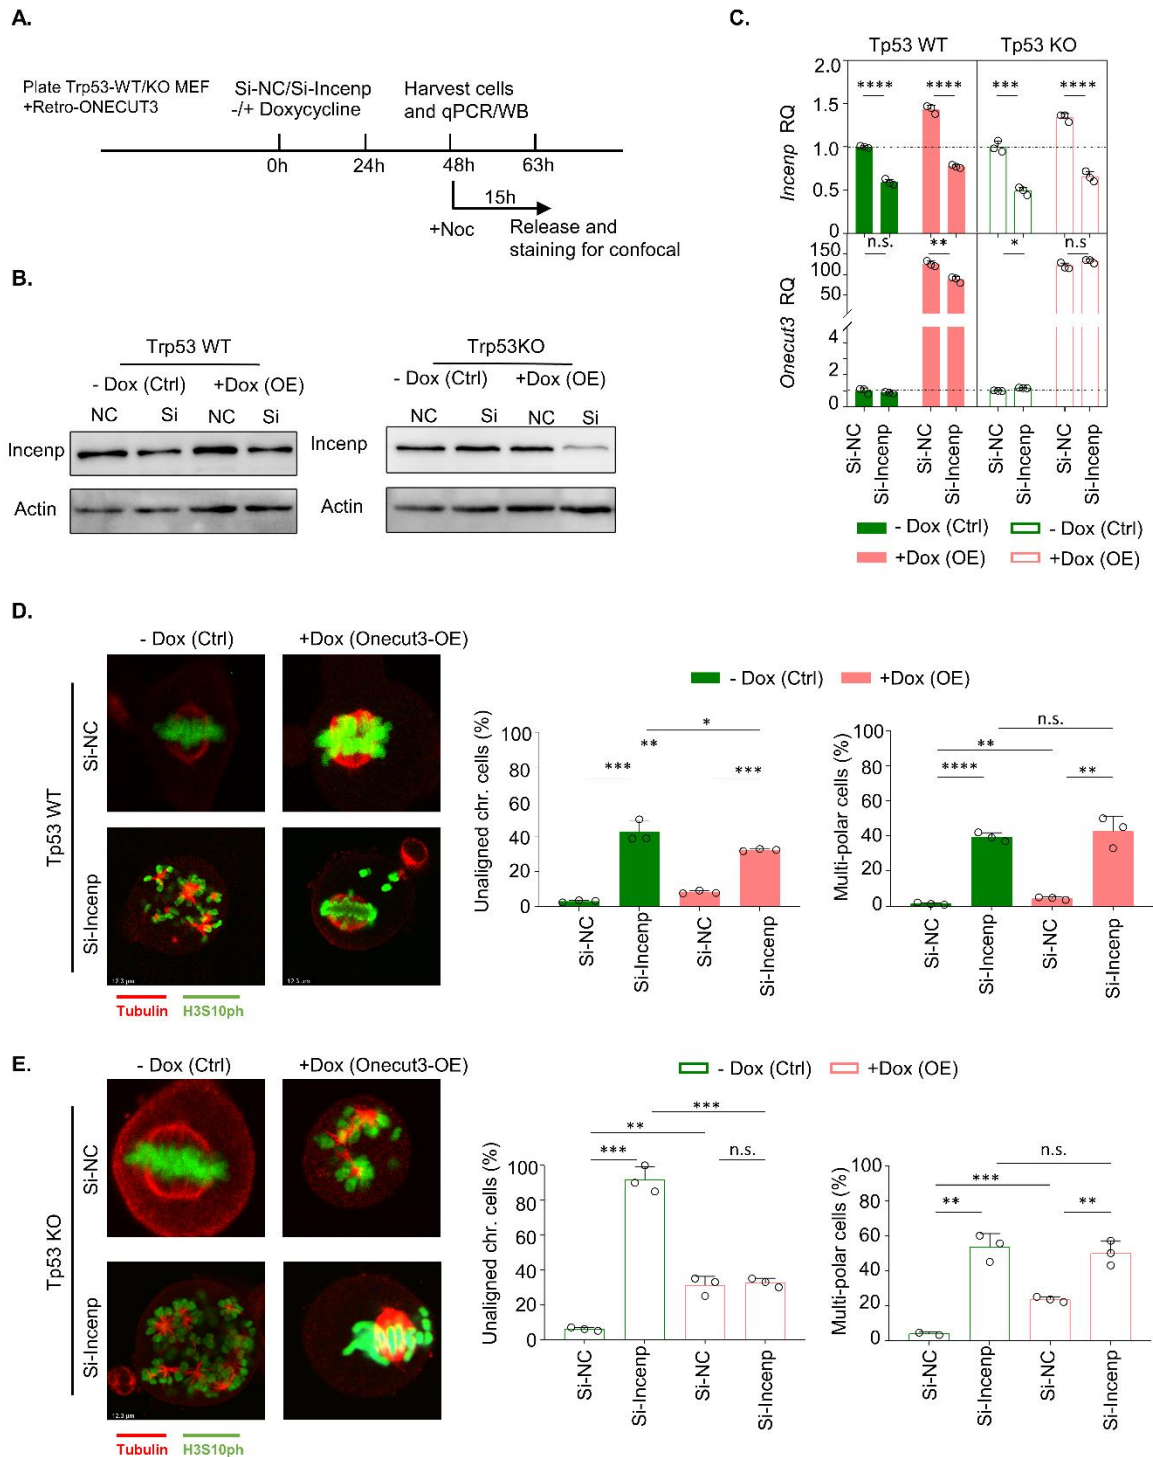

130

131 **Supplemental Figure 6 (Related to Figure 4). Overexpression of ONECUT3 leads to**  
 132 **dysregulation of Chromosomal Passenger Complex and mitotic defects.**

133 **A.** Schematic overview of the experiment: in the setting of Tp53-WT or Tp53-KO MEF cells that  
 134 were stably transduced with Retro-ONECUT3, the reduction of Incenp expression was achieved

135 using small interfering RNA (siRNA), and this reduction was coordinated with the regulation of  
136 *Onecut3* expression, both in the absence and presence of doxycycline (DOX). After a period of  
137 48 hours, the cells were collected for quantitative polymerase chain reaction (qPCR) or Western  
138 blotting (WB). Additionally, to ensure synchronization of the cell cycle, nocodazole was  
139 introduced for an additional 15 hours, followed by washout for immuno-staining and confocal  
140 analysis. **B-C.** The cell lysates were harvested after the treatment with or without 48h  
141 Doxycycline (100 ng ml<sup>-1</sup>) in control or *Incenp*-silenced Tp53-WT and Tp53-KO MEF and were  
142 then blotted against anti-*Incenp* antibodies (B.) or quantitated of mRNA level of *Incenp* and  
143 *Onecut3* (C.). Loading control is *Actin*. **D.** Left: The representative co-immunostaining image  
144 against H3S10ph (green) and Tubulin (red) of control or *Incenp*-silenced Tp53-WT MEF with (red  
145 box) or without *Onecut3*-OE (green box); Right: The frequencies of unaligned chromosomes and  
146 multi-polar cells were quantified in control (Si-NC) or si-*Incenp* cells; n=3. **E.** Corresponding  
147 Tp53-KO part as D. Scale bar, 12.3 μm (D-E.); Statistical analysis was performed using a two-  
148 tailed paired Student t-test (B and E); n. s. not significant, \*P <0.05, \*\*P <0.01, \*\*\* P <0.001, \*\*\*\*  
149 P <0.0001.  
150

**Fig. S7**

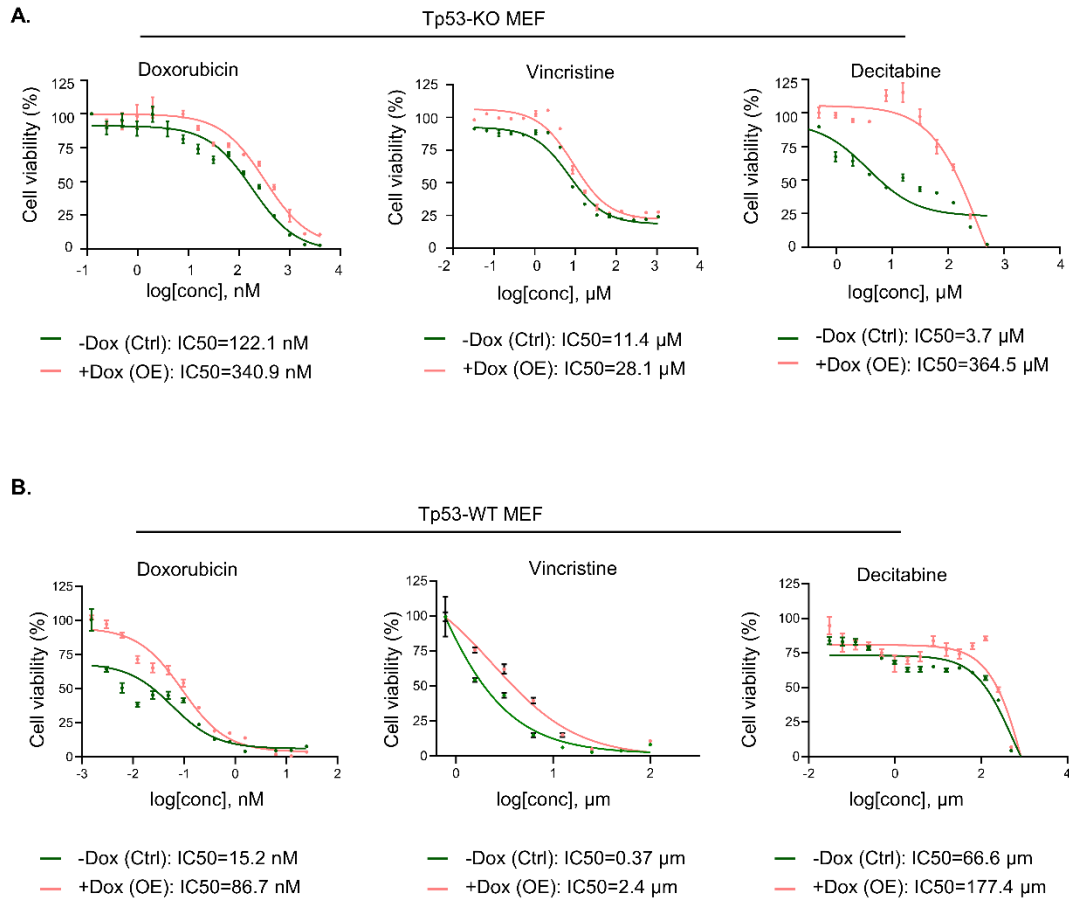

151

152

**Supplemental Figure 7 (Related to Figure 5) ONECUT3-overexpressing cells present multiple drug resistance, which could be mitigated by targeting to ONECUT3-CPC axis.**

153

154

**A-B.** Overexpressed Onecut3 in Tp53-KO MEFs were induced for 7-10 days, and the control cells (-Dox) were cultured simultaneously. The cells were later treated with the chemo-drugs for 48 hours, and the cell viability was tested by CellTiter-Luminescence. The drug sensitivity of the topoisomerase II inhibitor, Doxorubicin (left), the tubulin inhibitor Vincristine (middle), and the DNA methyltransferase inhibitor Decitabine (right) was indicated as IC50. **B.** Overexpressed Onecut3 in Tp53-WT MEFs was also induced in the same condition as above and treated with Doxorubicin (left), Vincristine (middle), and Decitabine (right).

156

157

158

159

160

161

162

**Fig. S8**

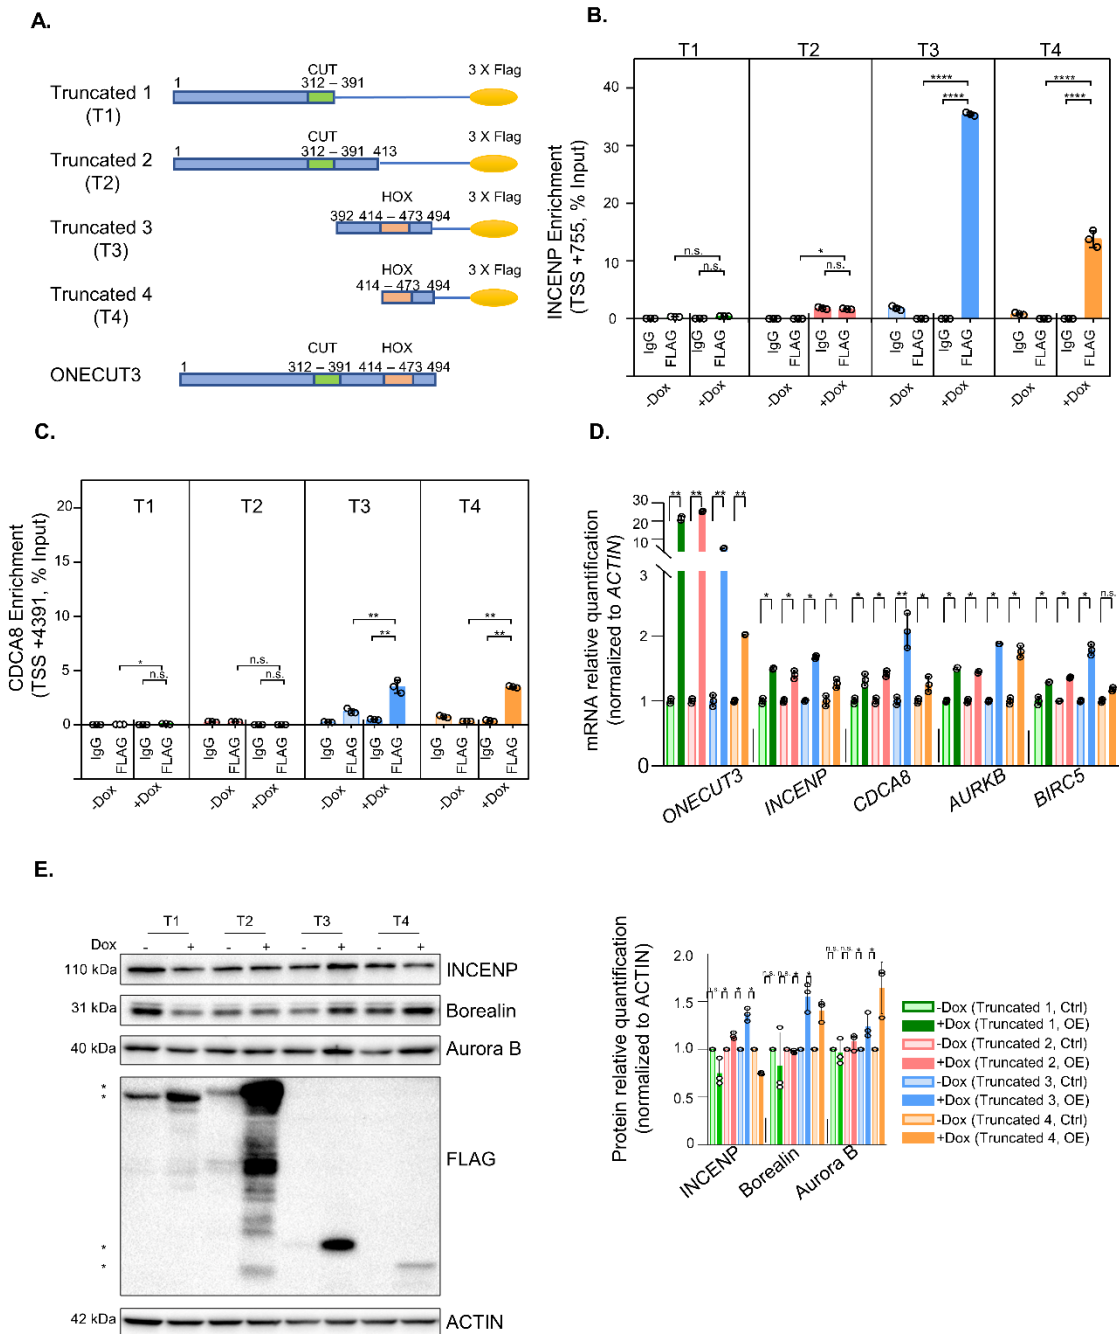

163

164 **Supplemental Figure 8 (Related to Figure 5) ONECUT3-overexpressing cells present**

165 **multiple drug resistance, which could be mitigated by targeting to ONECUT3-CPC axis.**

166 **A.** Schematic representation of ONECUT3 protein. The full length of ONECUT3 protein includes

167 two domains: CUT (green) and HOX (Homeodomain, orange). The plasmids of truncated

168 ONECUT3 with 3x Flag-tag were constructed. **B-C.** Truncated variants of FLAG-tagged

169 ONECUT3 plasmids were transiently transfected in HEK293T cells. ChIP-qPCR assays were

170 conducted using IgG and FLAG antibodies after 48 hours of Doxycycline induction. The graph  
 171 shows the comparative analysis o of INCENP (B) and CDCA8 (C) enrichment in control (-Dox)  
 172 and truncated-ONECUT3-OE (+Dox); n=3. **D-E.** qPCR and Western-blot were also conducted to  
 173 assess the mRNA (D) and protein levels of CPC components (E).  
 174

**Fig. S9**

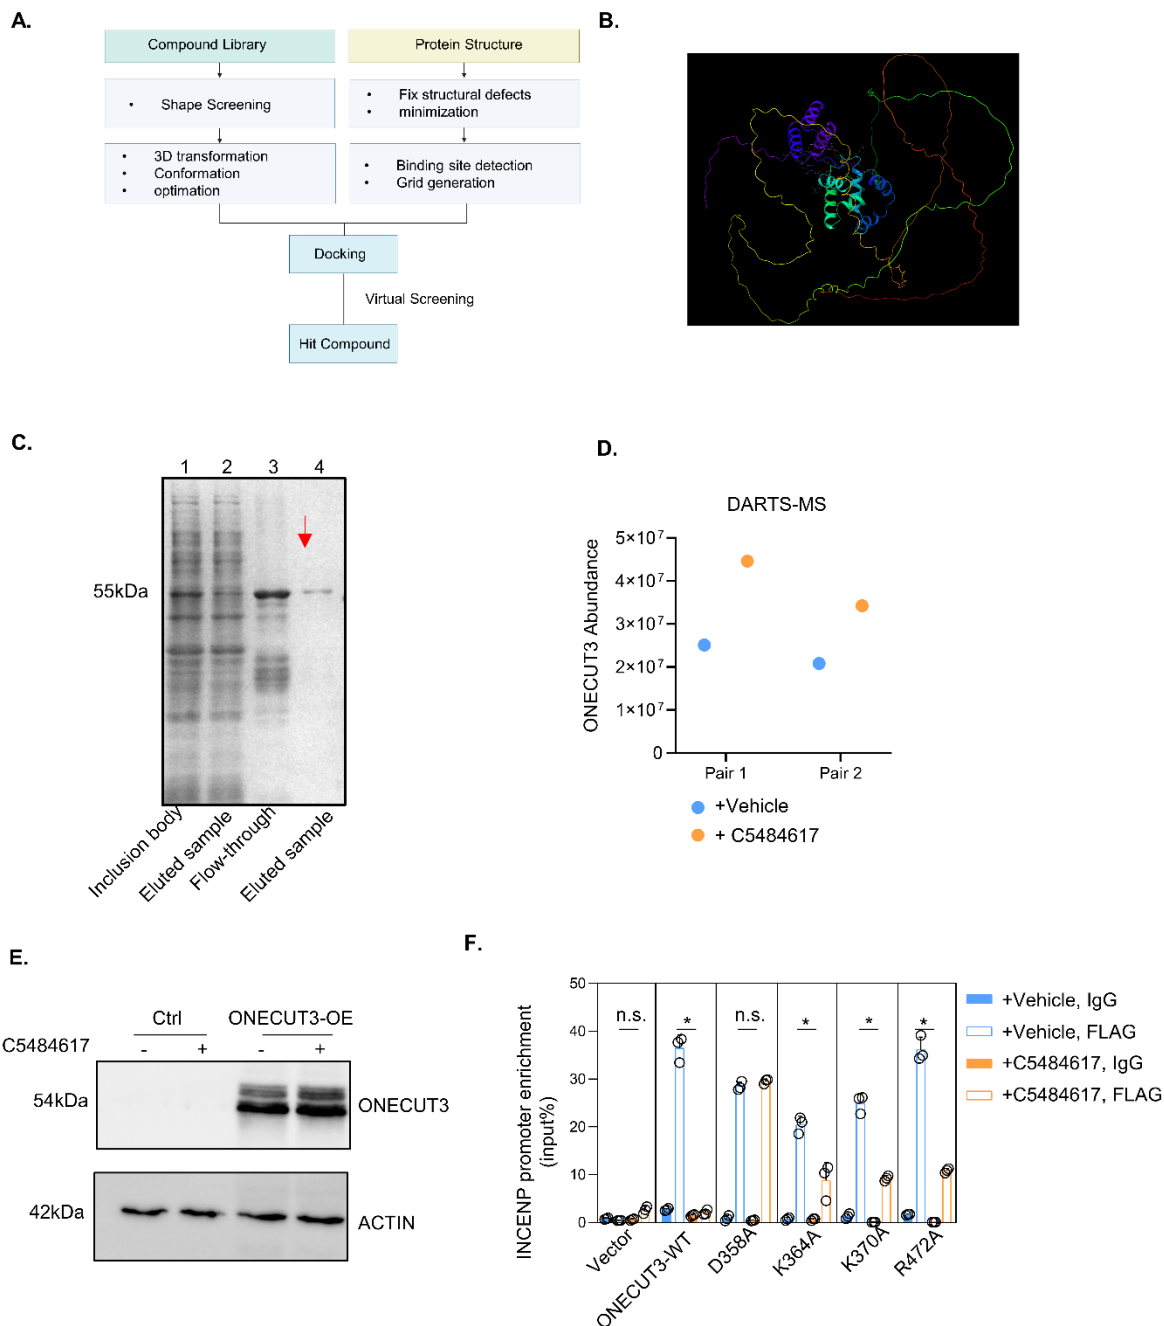

175

176 **Supplemental Figure 9 (Related to Figure 5) ONECUT3-overexpressing cells present**



177 **multiple drug resistance, which could be mitigated by targeting to ONECUT3-CPC axis.**

178 **A.** Virtual Flow for Virtual Screening. Alpha-Fold2 was used to obtain the three-dimensional  
179 structure of the human ONECUT3 protein, and the hydrophobic core cavity near D358, K364,  
180 R468, N471, and R472 was served as a possible binding site. As the target region, hydrogen  
181 bonds, salt bridges, etc., were added, which were used as structural templates for subsequent  
182 virtual screening. Subsequently, we used the 500,000 compounds from Hit2Lead compound  
183 library (ChemBridge) for 3D optimization. **B.** The three-dimensional structure of the human  
184 ONECUT3 protein was modeled using the Alpha-Fold v2.0. **C.** Western blot analysis for  
185 recombinant ONECUT3 protein purified the inclusion body proteins using Ni-Smart affinity  
186 chromatography. Lane 1: inclusion body; lane 2: flow-through; lane 3-4: eluted sample; **D.** The  
187 target hits were obtained by LC-MS/MS data after Drug Affinity Responsive Target Stability  
188 (DARTS); n =2. **E.** Western blot analysis of ONECUT3 in ONECUT3-OE HEK293T cells treated  
189 with C5484617 for 48 hours; **F.** HEK293T cells were transiently transfected with control (MSCV-  
190 vector), ONECUT3-OE (MSCV-ONECUT3-WT) and ONECUT3 point mutation (ONECUT3-  
191 D358A, ONECUT3-K364A, ONECUT3-K370A, and ONECUT3-R472A) constructs for a duration  
192 of 48 hours. Following this, CHIP-qPCR assays were performed using IgG and FLAG antibodies.  
193 after an additional 36-hour treatment with either Vehicle (DMSO) or 2.5  $\mu$ M C5484617. The graph  
194 illustrates the comparative analysis of the enrichment of INCENP promoter in different treatment  
195 groups; N=3.

Fig. S10

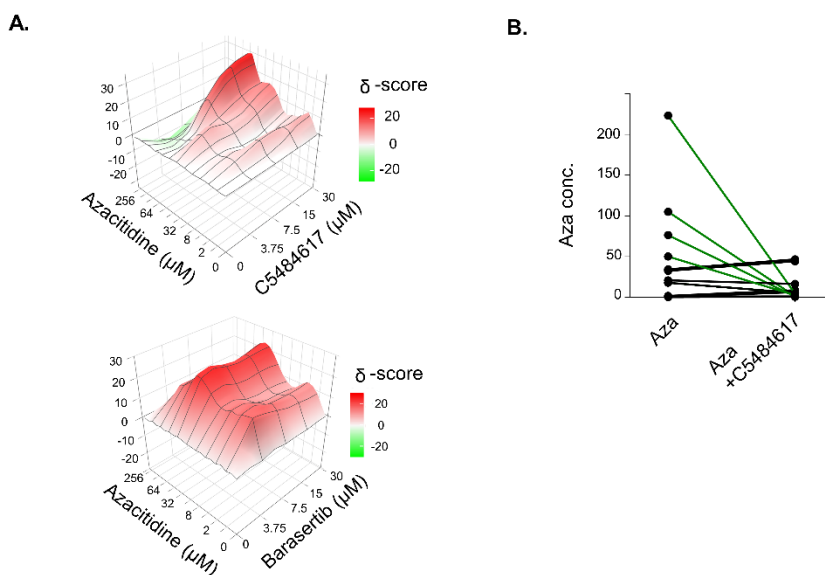

196

197

198 **Supplemental Figure 10 (Related to Figure 5) ONECUT3-overexpressing cells present**  
199 **multiple drug resistance, which could be mitigated by targeting to ONECUT3-CPC axis.**

200 **A.** The Overexpressed Onecut3 in Tp53-KO MEFs was induced for 7 days, and the cells were  
201 later treated with the above drugs for 48 h. Dose-response surface for Azacitidine plus C5484617  
202 (lead compound targeting ONECUT3) and Azacitidine plus Barasertib was calculated by  
203 SynergyFinder 2.0. ZIP synergy score of Azacitidine plus C5484617: 11.925, ZIP synergy score  
204 of Azacitidine plus Barasertib: 15.276. **B.** The IC50 of Azacitidine in 'Azacitidine alone' group, in  
205 'Azacitidine with 1μM C5484617' group; the green line indicates that the concentration of  
206 Azacitidine decreased after the combination with C5484617'.

207

**Fig. S11**

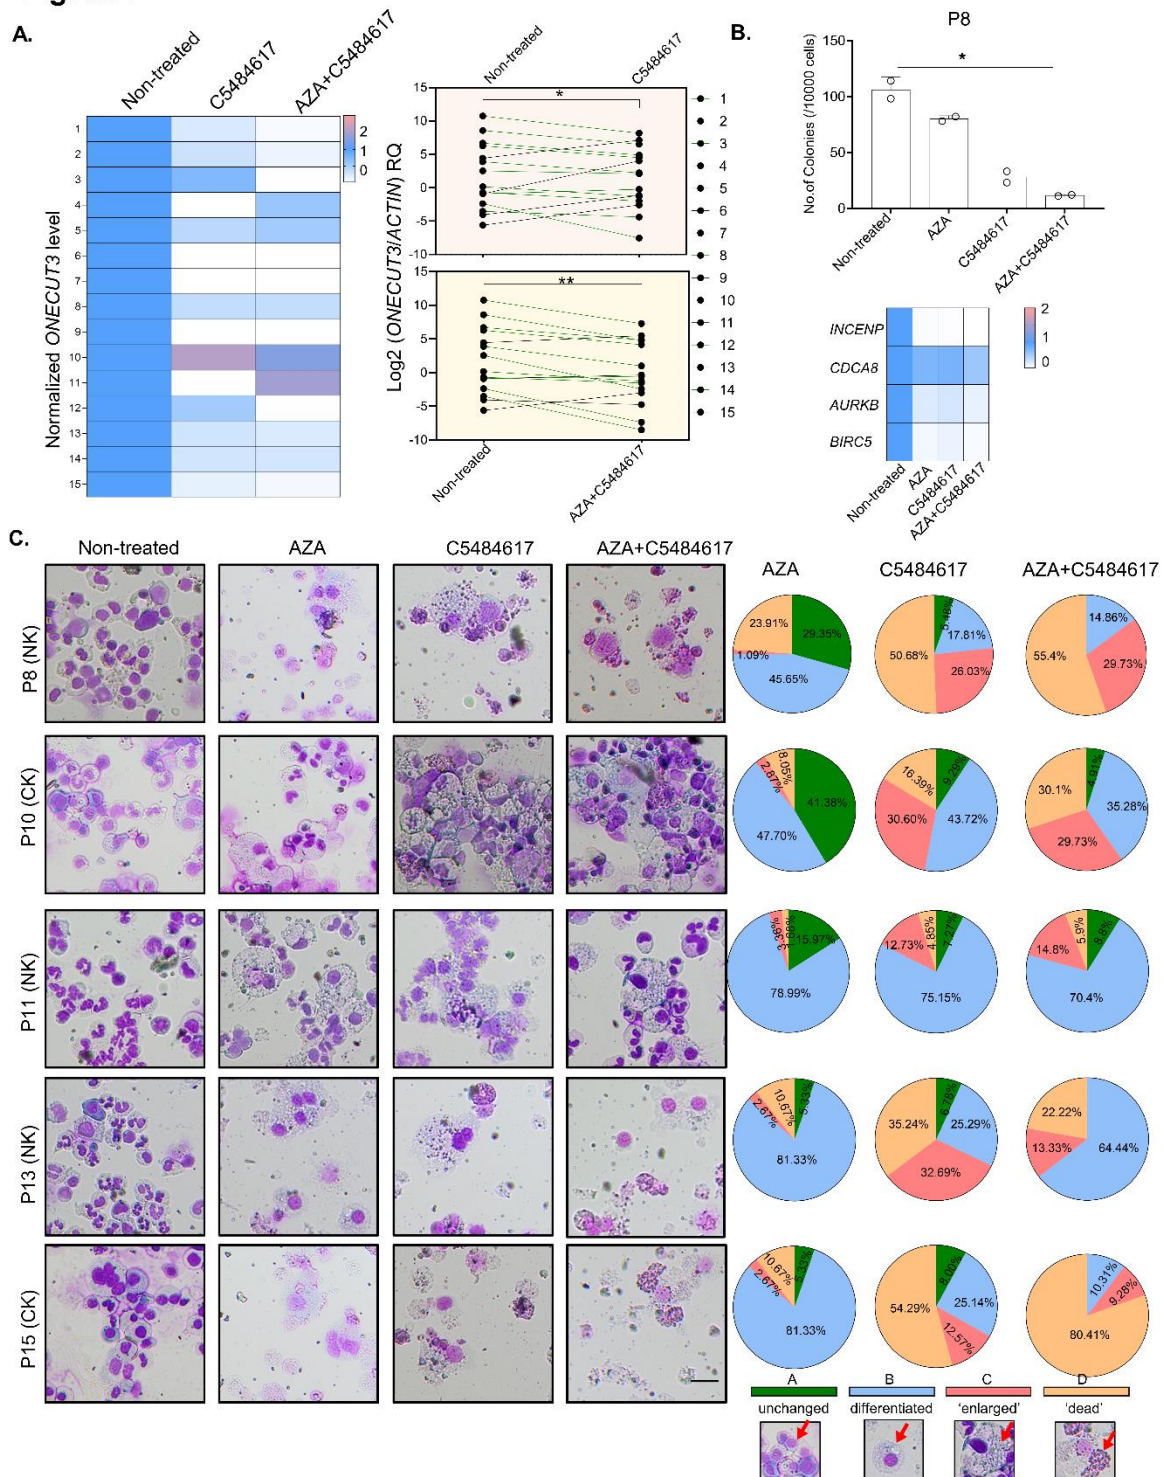

208

209 **Supplemental Figure 11 (Related to Figure 5) ONECUT3-overexpressing cells present**

210 **multiple drug resistance, which could be mitigated by targeting to ONECUT3-CPC axis.**

211 **A.** Left: The mRNA level heatmap of *ONECUT3* was normalized in 15 newly diagnosed MDS

212 patients before and after treatment with C5484617 and Azacitidine with C5484617. Right: Each

213 data point represents the individual expression of *ONECUT3* before and after treatment with  
214 C5484617 and Azacitidine with C5484617; the green line indicates that the level of *ONECUT3*  
215 decreased after treatment. **B.** The representative data from the BM mononuclear cells of MDS  
216 patient following 48 hours of drug treatments (Azacitidine, C5484617, Azacitidine with C5484617):  
217 the quantification of clone numbers (upper), and the assessment of *ONECUT3/*  
218 *INCENP/CDCA8/AURKB/BIRC5* mRNA levels (lower). **C.** The representative images (left) and  
219 proportions (upper right) of morphological changes in five patients diagnosed with MDS following  
220 treatment with Azacitidine, C5484617, Azacitidine with C5484617 for 48 h; a schematic diagram  
221 illustrating the morphological changes associated with types A-D (lower right). Scale bar: 100  $\mu$ m.  
222  
223

Supplemental Table 1. Clinical characteristics of 5 paired patients

| No.   | Gender | Age | Blast (%) | Karyotype                                                                                             | Mutation                |
|-------|--------|-----|-----------|-------------------------------------------------------------------------------------------------------|-------------------------|
| # CK1 | Female | 60  | 5         | 46, XX, t(1;21)(p11;q22), del(5)(q31), del(20)(q11)[1]/46, idem, ? Inv(2)(p11q37)[8]/46, XX[1].       | NRAS, JAK2              |
| # NK1 | Female | 69  | 6.5       | 46, XX[20].                                                                                           | JAK2                    |
| # CK2 | Male   | 66  | 11        | 39, XY, -7,-12,-13, der(14;15)(q10;q10), -17,-18,-19,-20,+mar[3]/39, idem, +mar [1].                  | TET2                    |
| # NK2 | Male   | 77  | 14        | 46, XY[20].                                                                                           | EZH2, ASXL1, RUNX1      |
| # CK3 | Male   | 74  | 3         | 43, XY, der(5)(q15), -7,-8,dic(12)(p10)[5]/46, XY [5].                                                | U2AF1                   |
| # NK3 | Male   | 77  | 6         | 46, XY[20].                                                                                           | U2AF1                   |
| # CK4 | Male   | 33  | 6         | 40-42, XY, -4[5], del(5)(q31), -7, -10[8], -18, -19[3], -21*2, -22,+1-2mar, 1 lace [6][10].           | CBL, BCOR, PTPN11, JAK2 |
| # NK4 | Male   | 23  | 4.5       | 46, XY[20].                                                                                           | BCOR, JAK2              |
| # CK5 | Female | 45  | 2         | 51-52, XX, +1,+2, +4, +5, del(5)(q22), -7[2],-9[2],-13[3],+15[4],+19[3],+21[3],+1-3 mar, 1min [3][5]. | PTPN11, ZRSR2           |
| # NK5 | Female | 51  | 3         | 46, XX[20].                                                                                           | ZRSR2                   |

225 **Supplemental Table 2: The list of top 100-upregulated genes by the differential analysis**  
 226 **from the paired RNA-seq (CK vs. NK)**

| Gene name         | log2FoldChange | p-value  | Gene name          | log2FoldChange | p-value |
|-------------------|----------------|----------|--------------------|----------------|---------|
| <i>PAPPA-AS1</i>  | -8.370247706   | 1.55E-06 | <i>ZNF385D-AS2</i> | -5.1811        | 0.01574 |
| <i>MIR3945HG</i>  | -7.568413225   | 8.59E-06 | <i>ZBTB8OS</i>     | -5.1721        | 0.01655 |
| <i>CLDN22</i>     | -7.25187269    | 9.84E-05 | <i>TDRP</i>        | -5.1954        | 0.01762 |
| <i>Ac100800.1</i> | -5.26128681    | 0.00029  | <i>C7orf61</i>     | -5.1265        | 0.01768 |
| <i>INHBA-AS1</i>  | -6.23209857    | 0.00031  | <i>LINC01767</i>   | -5.1647        | 0.01803 |
| <i>AC004817.4</i> | -6.612589558   | 0.00033  | <i>AC010542.3</i>  | -5.1364        | 0.01897 |
| <i>GPR32</i>      | -6.938259791   | 0.00036  | <i>TMEM185B</i>    | -5.2616        | 0.01899 |
| <i>RPL23AP40</i>  | -5.618926686   | 0.0005   | <i>CSGALNACT1</i>  | -5.2052        | 0.01908 |
| <i>SDCBPP1</i>    | -4.381426879   | 0.00075  | <i>AC131280.1</i>  | -5.2174        | 0.01956 |
| <i>GPR171</i>     | -3.023445181   | 0.00079  | <i>MTATP6P29</i>   | -5.1133        | 0.01962 |
| <i>AL138787.1</i> | -6.385364224   | 0.00082  | <i>CYBB</i>        | -4.746         | 0.02051 |
| <i>ATP5F1E</i>    | -4.232666215   | 0.00098  | <i>MIR4252</i>     | -5.1424        | 0.02137 |
| <i>PIWIL4</i>     | -6.329327459   | 0.00104  | <i>AC090970.3</i>  | -5.0423        | 0.02225 |
| <i>OPTN</i>       | -6.051879115   | 0.00122  | <i>AC092608.1</i>  | -5.0166        | 0.02285 |
| <i>AL158840.1</i> | -5.810897049   | 0.0013   | <i>PSMA2P1</i>     | -5.1562        | 0.02326 |
| <i>SRGAP3-AS3</i> | -6.062945429   | 0.00172  | <i>RPL17P40</i>    | -5.1196        | 0.02477 |
| <i>AC007919.1</i> | -5.958300294   | 0.002    | <i>MTCO1P29</i>    | -5.0638        | 0.02541 |
| <i>MGC15885</i>   | -5.574965521   | 0.00247  | <i>ZNF81</i>       | -5.0609        | 0.02647 |
| <i>ONECUT3</i>    | -5.777742851   | 0.00254  | <i>AL591770.1</i>  | -4.9637        | 0.02747 |
| <i>AC110603.1</i> | -5.946799551   | 0.00257  | <i>RNA5SP39</i>    | -4.9922        | 0.02942 |
| <i>RIOK2</i>      | -5.85588304    | 0.00259  | <i>P2RX7</i>       | -5.0198        | 0.02958 |
| <i>AL669841.1</i> | -5.951848554   | 0.00298  | <i>RNA5SP187</i>   | -4.9039        | 0.02964 |
| <i>AC090260.1</i> | -6.132449441   | 0.00298  | <i>AL662844.4</i>  | -4.9126        | 0.02998 |
| <i>BNIP3P16</i>   | -5.676970491   | 0.0039   | <i>AP003086.1</i>  | -4.9234        | 0.0307  |
| <i>C15orf56</i>   | -5.792683118   | 0.00488  | <i>TTC30A</i>      | -4.9299        | 0.0316  |
| <i>DNAAF3</i>     | -5.897917587   | 0.00513  | <i>Y_RNA</i>       | -4.8798        | 0.03193 |
| <i>HCG27</i>      | -5.663778551   | 0.0053   | <i>AC008806.1</i>  | -4.9484        | 0.03195 |
| <i>RNY1P15</i>    | -5.63205437    | 0.0053   | <i>AL928654.2</i>  | -4.9736        | 0.03303 |
| <i>EREG</i>       | -5.804715794   | 0.0053   | <i>KLF2</i>        | -4.9964        | 0.03335 |
| <i>NME7</i>       | -5.007978454   | 0.00552  | <i>ARL4AP3</i>     | -4.9798        | 0.03435 |
| <i>AC110079.2</i> | -5.90122472    | 0.00597  | <i>FGF11</i>       | -4.9364        | 0.03445 |
| <i>FPR3</i>       | -4.869901424   | 0.00633  | <i>TRPM7</i>       | -4.9082        | 0.03574 |
| <i>AP006216.1</i> | -5.509571023   | 0.00637  | <i>LINC02022</i>   | -4.8374        | 0.03603 |
| <i>AL035661.1</i> | -4.97564528    | 0.0071   | <i>ZNF766</i>      | -4.8442        | 0.03616 |
| <i>FFAR2</i>      | -5.596150296   | 0.00763  | <i>RPSAP51</i>     | -4.8144        | 0.03699 |
| <i>RNU6-1257P</i> | -5.073178536   | 0.00787  | <i>AC097639.2</i>  | -4.7981        | 0.03782 |
| <i>RNU6-733P</i>  | -5.508352323   | 0.00858  | <i>MS4A8</i>       | -4.884         | 0.03784 |

|                   |              |         |                   |         |         |
|-------------------|--------------|---------|-------------------|---------|---------|
| <i>CTHRC1</i>     | -4.982253764 | 0.00919 | <i>ITGA2</i>      | -4.8572 | 0.03806 |
| <i>CELF2</i>      | -4.97469858  | 0.0094  | <i>AC141002.1</i> | -4.8572 | 0.03806 |
| <i>BNIP3P38</i>   | -5.405390269 | 0.00973 | <i>NGRN</i>       | -4.7819 | 0.0398  |
| <i>AC008758.2</i> | -5.471251242 | 0.00988 | <i>UCA1</i>       | -4.7866 | 0.04    |
| <i>BCL2A1</i>     | -5.462762914 | 0.01049 | <i>AC007950.2</i> | -4.7866 | 0.04    |
| <i>TGFB3-AS1</i>  | -5.357497583 | 0.01058 | <i>RPL12P32</i>   | -4.8008 | 0.04013 |
| <i>AL451074.1</i> | -4.874554132 | 0.01104 | <i>BNIP3P26</i>   | -4.8173 | 0.04066 |
| <i>DQX1</i>       | -5.361344201 | 0.01126 | <i>SAG</i>        | -4.7985 | 0.04093 |
| <i>RBBP4</i>      | -4.877885709 | 0.01129 | <i>TCFL5</i>      | -4.8081 | 0.04278 |
| <i>ROPN1L-AS1</i> | -5.015593848 | 0.01213 | <i>AC133528.1</i> | -4.7533 | 0.04437 |
| <i>LINC01864</i>  | -4.919622491 | 0.01246 | <i>AC020611.2</i> | -4.8273 | 0.04497 |
| <i>AL139082.1</i> | -5.260029401 | 0.01288 | <i>AL500527.2</i> | -4.8283 | 0.04512 |
| <i>AC104090.1</i> | -5.403072088 | 0.01321 | <i>AL031848.1</i> | -5.5109 | 0.05107 |

227  
228  
229  
230  
231  
232  
233  
234  
235  
236  
237  
238  
239  
240  
241  
242  
243  
244  
245  
246

247 **Supplemental Table 3: Univariable and multivariable analysis of factors associated with**  
 248 **overall survival in MDS patients**

| Variables                                            | HR (95% CI)      | Univariate analysis |                  | Multivariate analysis |  |
|------------------------------------------------------|------------------|---------------------|------------------|-----------------------|--|
|                                                      |                  | P value*            | HR (95% CI)      | P value*              |  |
| Age (>60yrs VS <60yrs)                               | 1.26 (0.69-2.31) | 0.46                | 1.26 (0.69-2.30) | 0.460                 |  |
| Gender (Male/female)                                 | 1.46 (0.78-2.73) | 0.24                | 1.64 (0.78-2.73) | 0.109                 |  |
| IPSS-R Higher-risk<br>(Higher VS Lower)              | 4.67 (2.18-9.98) | 0.001*              | 3.98 (1.92-8.24) | 0.001*                |  |
| Karyotype group<br>(Normal VS Complex &<br>Abnormal) | 0.79 (0.51-1.24) | 0.311               | 0.79 (0.50-1.23) | 0.291                 |  |
| Log <i>ONECUT3</i> RQ<br>(High/Low)                  | 2.30 (1.20-4.42) | 0.012*              | 2.00 (1.06-3.78) | 0.033*                |  |

249  
 250  
 251  
 252  
 253  
 254  
 255  
 256  
 257  
 258



**Supplemental Table 4. Clinical characteristics of 165 MDS patients with TP53 Wild type**

|                                                    | Total<br>(n=165) | Low <i>ONECUT3</i><br>expression<br>(n=56) | High <i>ONECUT3</i><br>expression<br>(n=109) | P<br>value* |
|----------------------------------------------------|------------------|--------------------------------------------|----------------------------------------------|-------------|
| Age, median (range)                                | 57 (15-81)       | 57.5 (17-77)                               | 56.0 (15-81)                                 | 0.586       |
| Gender<br>(male/female)                            | 1.6 (101/64)     | 1.5 (34/22)                                | 1.6 (100/63)                                 | 0.933       |
| WBC (*10 <sup>9</sup> /L),<br>median (range)       | 2.6 (0.6-9.3)    | 2.9 (0.7-9.3)                              | 2.6 (0.6-8.96)                               | 0.211       |
| ANC (*10 <sup>9</sup> /L),<br>median (range)       | 1.2 (0.1-8.2)    | 1.4 (0.2-5.4)                              | 1.2 (0.1-8.2)                                | 0.221       |
| Hemoglobin (g/dL),<br>median (range)               | 80 (38-144)      | 81.5 (38.0-138.0)                          | 80.0(39.0-144.0)                             | 0.895       |
| Platelets (*10 <sup>9</sup> /L),<br>median (range) | 57 (3-534)       | 58.5 (8.0-439.0)                           | 55.0 (3.0-534.0)                             | 0.652       |
| BM blasts (%),<br>median (range)                   | 3.0 (0-19)       | 3.0 (0-18.0)                               | 3.0 (0-19.0)                                 | 0.446       |
| 2016 WHO subtypes,<br>n, (%)                       |                  |                                            |                                              | 0.083       |
| MDS-U                                              | 12 (7.3%)        | 8 (14.3%)                                  | 4 (3.6%)                                     |             |
| SLD                                                | 16 (9.7%)        | 4 (7.1%)                                   | 12 (10.9%)                                   |             |
| MLD                                                | 61 (37.0%)       | 20 (35.7%)                                 | 41 (37.3%)                                   |             |
| RS                                                 | 13 (7.9%)        | 6 (10.7%)                                  | 7 (6.4%)                                     |             |
| EB-1                                               | 34 (20.6%)       | 12 (21.4%)                                 | 21(19.1%)                                    |             |
| EB-2                                               | 28 (17%)         | 5 (8.9%)                                   | 23 (22.9%)                                   |             |
| 5q- syndrome                                       | 1 (0.6%)         | 0 (0%)                                     | 1 (1.2%)                                     |             |
| IPSS-R risk<br>categories, n, (%)                  |                  |                                            |                                              | 0.094       |
| Very good                                          | 7 (4.2%)         | 2 (3.6%)                                   | 5 (4.6%)                                     |             |
| Good                                               | 41 (24.7%)       | 15 (26.8%)                                 | 26 (23.9%)                                   |             |
| Intermediate                                       | 50 (30.1%)       | 21 (37.5%)                                 | 29 (26.6%)                                   |             |
| Poor                                               | 46 (27.7%)       | 16 (28.6%)                                 | 30 (27.5%)                                   |             |
| Very poor                                          | 21 (12.7%)       | 2 (3.6%)                                   | 19 (17.4%)                                   |             |
| Karyotype subgroup1                                |                  |                                            |                                              | 0.009*      |
| Normal                                             | 93 (56.0%)       | 38 (67.9%)                                 | 55 (50.5%)                                   |             |
| 1-2 Abnormal                                       | 60 (36.1%)       | 18 (32.1%)                                 | 42 (38.5%)                                   |             |
| Complex (≥3)                                       | 12 (7.2%)        | 0 (0%)                                     | 12 (11%)                                     |             |
| Karyotype subgroup 2                               |                  |                                            |                                              | 0.079       |
| Normal                                             | 93 (56%)         | 38 (67.9%)                                 | 55 (50.5%)                                   |             |
| Numerical abnormal                                 | 23 (13.9%)       | 8 (14.3%)                                  | 15 (13.8%)                                   |             |
| Structural abnormal                                | 32 (19.3%)       | 8 (14.3%)                                  | 24 (22%)                                     |             |
| Numerical and<br>structural abnormal               | 17 (10.2%)       | 2 (3.6%)                                   | 15 (13.8%)                                   |             |

260

261

262

263

**Supplemental Table 5. The correlation of *ONECUT3* mRNA expression and recurrent gene**

264

**mutation in MDS patients**

| Mutational variable | Mutation status | N   | Low <i>ONECUT3</i><br>expression<br>(n=56) | High <i>ONECUT3</i><br>expression<br>(n=109) | P value* |
|---------------------|-----------------|-----|--------------------------------------------|----------------------------------------------|----------|
| <i>ASXL1</i>        | WT <sup>+</sup> | 140 | 48                                         | 92                                           | 0.824    |
|                     | Mutated         | 25  | 8                                          | 17                                           |          |
| <i>BCOR</i>         | WT              | 151 | 53                                         | 98                                           | 0.386    |
|                     | Mutated         | 14  | 3                                          | 11                                           |          |
| <i>CBL</i>          | WT              | 157 | 53                                         | 104                                          | 0.999    |
|                     | Mutated         | 8   | 3                                          | 5                                            |          |
| <i>CEBPA</i>        | WT              | 160 | 55                                         | 105                                          | 0.663    |
|                     | Mutated         | 5   | 1                                          | 4                                            |          |
| <i>CREBBP</i>       | WT              | 157 | 53                                         | 103                                          | 0.719    |
|                     | Mutated         | 8   | 2                                          | 6                                            |          |
| <i>CSF3R</i>        | WT              | 160 | 53                                         | 107                                          | 0.338    |
|                     | Mutated         | 5   | 3                                          | 2                                            |          |
| <i>CUX1</i>         | WT              | 161 | 55                                         | 106                                          | 0.999    |
|                     | Mutated         | 4   | 1                                          | 3                                            |          |
| <i>DNMT3A</i>       | WT              | 151 | 51                                         | 100                                          | 0.999    |
|                     | Mutated         | 14  | 5                                          | 9                                            |          |
| <i>EP300</i>        | WT              | 157 | 53                                         | 104                                          | 0.999    |
|                     | Mutated         | 8   | 3                                          | 5                                            |          |
| <i>ETV6</i>         | WT              | 157 | 52                                         | 105                                          | 0.446    |
|                     | Mutated         | 8   | 4                                          | 4                                            |          |
| <i>EZH2</i>         | WT              | 157 | 52                                         | 105                                          | 0.446    |
|                     | Mutated         | 8   | 4                                          | 4                                            |          |
| <i>FLT3</i>         | WT              | 160 | 55                                         | 105                                          | 0.663    |
|                     | Mutated         | 5   | 1                                          | 4                                            |          |
| <i>GATA1</i>        | WT              | 164 | 56                                         | 108                                          | 0.999    |
|                     | Mutated         | 1   | 0                                          | 1                                            |          |
| <i>GATA2</i>        | WT              | 163 | 55                                         | 108                                          | 0.999    |
|                     | Mutated         | 2   | 1                                          | 1                                            |          |
| <i>IDH1</i>         | WT              | 158 | 56                                         | 102                                          | 0.097    |
|                     | Mutated         | 7   | 0                                          | 7                                            |          |
| <i>IDH2</i>         | WT              | 159 | 51                                         | 108                                          | 0.018*   |
|                     | Mutated         | 6   | 5                                          | 1                                            |          |
| <i>JAK2</i>         | WT              | 161 | 53                                         | 108                                          | 0.114    |
|                     | Mutated         | 4   | 3                                          | 1                                            |          |
| <i>KIT</i>          | WT              | 163 | 55                                         | 108                                          | 0.999    |

265

266

267

268

269

270

271  
272

**Continued Supplemental Table 5. The correlation of *ONECUT3* mRNA expression and recurrent gene mutation in MDS patients**

| Mutational variable | Mutation status | N   | Low <i>ONECUT3</i> expression (n=56) | High <i>ONECUT3</i> expression (n=109) | P value* |
|---------------------|-----------------|-----|--------------------------------------|----------------------------------------|----------|
| <i>KMT2D</i>        | Mutated         | 2   | 1                                    | 1                                      | 0.033*   |
|                     | WT              | 156 | 50                                   | 106                                    |          |
| <i>KRAS</i>         | Mutated         | 9   | 6                                    | 3                                      | 0.097    |
|                     | WT              | 159 | 56                                   | 103                                    |          |
| <i>NPM1</i>         | Mutated         | 6   | 0                                    | 6                                      | 0.549    |
|                     | WT              | 163 | 56                                   | 107                                    |          |
| <i>NRAS</i>         | Mutated         | 2   | 0                                    | 2                                      | 0.999    |
|                     | WT              | 157 | 53                                   | 104                                    |          |
| <i>PHF6</i>         | Mutated         | 8   | 3                                    | 5                                      | 0.029*   |
|                     | WT              | 156 | 56                                   | 100                                    |          |
| <i>PTPN11</i>       | Mutated         | 9   | 0                                    | 9                                      | 0.425    |
|                     | WT              | 158 | 55                                   | 103                                    |          |
| <i>RUNX1</i>        | Mutated         | 7   | 1                                    | 6                                      | 0.382    |
|                     | WT              | 141 | 49                                   | 92                                     |          |
| <i>SETBP1</i>       | Mutated         | 24  | 7                                    | 17                                     | 0.999    |
|                     | WT              | 157 | 53                                   | 102                                    |          |
| <i>SF3B1</i>        | Mutated         | 10  | 3                                    | 7                                      | 0.185    |
|                     | WT              | 147 | 47                                   | 100                                    |          |
| <i>SRSF2</i>        | Mutated         | 18  | 9                                    | 9                                      | 0.409    |
|                     | WT              | 159 | 53                                   | 106                                    |          |
| <i>TET2</i>         | Mutated         | 6   | 3                                    | 3                                      | 0.502    |
|                     | WT              | 139 | 49                                   | 90                                     |          |
| <i>TP53</i>         | Mutated         | 26  | 7                                    | 19                                     | -        |
|                     | WT              | 165 | 56                                   | 109                                    |          |
| <i>U2AF1</i>        | Mutated         | -   | -                                    | -                                      | 0.168    |
|                     | WT              | 140 | 51                                   | 89                                     |          |
| <i>WT1</i>          | Mutated         | 25  | 5                                    | 20                                     | 0.665    |
|                     | WT              | 159 | 55                                   | 104                                    |          |
| <i>ZRSR2</i>        | Mutated         | 6   | 1                                    | 5                                      | 0.999    |
|                     | WT              | 159 | 54                                   | 105                                    |          |
|                     | Mutated         | 6   | 2                                    | 4                                      |          |

273 \*WT, wide type, MT, mutant type; \* P-value is less than 0.05.

274  
275  
276  
277  
278  
279

**Supplemental Table 6 Table of TOP20 Hit compounds from the virtual screening.**

| ChemBridge ID | Docking score | Glide gscore | Glide energy |
|---------------|---------------|--------------|--------------|
| 7889067       | -7.336        | -7.351       | -38.107      |
| 5135322       | -7.079        | -7.141       | -31.245      |
| 5140914       | -6.736        | -6.736       | -29.155      |
| 5264732       | -6.724        | -6.727       | -35.259      |
| 7962588       | -6.712        | -6.727       | -38.058      |
| 7962588       | -6.695        | -6.71        | -36.33       |
| 5135483       | -6.578        | -6.578       | -35.554      |
| 5226879       | -6.568        | -6.571       | -32.522      |
| 5160423       | -6.52         | -6.521       | -36.273      |
| 5160424       | -6.518        | -6.519       | -36.138      |
| 5267209       | -6.485        | -6.508       | -41.901      |
| 5266986       | -6.484        | -6.51        | -41.387      |
| 5989208       | -6.473        | -6.584       | -31.506      |
| 5484617       | -6.371        | -6.556       | -39.848      |
| 5631271       | -6.307        | -6.33        | -38.377      |
| 5405740       | -6.257        | -6.396       | -30.623      |
| 5135482       | -6.251        | -6.252       | -30.866      |
| 7875890       | -6.24         | -6.25        | -40.685      |
| 5160143       | -6.239        | -6.241       | -34.808      |
| 6665804       | -6.221        | -6.221       | -32.683      |

281

282 **Supplemental Table 7. Table of the predicted proteins of in Liquid Chromatography with**  
 283 **tandem mass spectrometry (LC-MS/MS) screening after DARTS.**

| P-value | Protein                                                                                                                                                                                                                                                                                                                                                                                                                                                                                                                                                                                                                                                                                                                                                                                                                                                                                                                                                                                                                                  |
|---------|------------------------------------------------------------------------------------------------------------------------------------------------------------------------------------------------------------------------------------------------------------------------------------------------------------------------------------------------------------------------------------------------------------------------------------------------------------------------------------------------------------------------------------------------------------------------------------------------------------------------------------------------------------------------------------------------------------------------------------------------------------------------------------------------------------------------------------------------------------------------------------------------------------------------------------------------------------------------------------------------------------------------------------------|
| P<0.001 | PRRC2C/TXN2/NDRG1/RALA/BICD2/MRPL50/SLC38A9/NOL10/USP19/SUCLG2/CMSS1/RAB17/MTFP1/SLC25A10/COL6A1/ENDOD1/RANBP1/SFSWAP/PRRC2A/MRPS34/RPS29/PDCD2/SPNS1/ACTL7A/GPX1/KLC2/ABAT/RAB5B/ARPC5/GSN/SEN3/MORF4L2/KIF5B/CLCN4/MICOS13/PTPN9/F11R/HYPK/NSMCE3/CTSA/RPS23/VPS51/ATM/GPR89B/ARF5/HBA1/TACC3/ESD/USP48/RAB5A/SLC25A19/CMTM6/MRPL46/TCP11L2/COPG2/DMD/DR1/ANK/IKBK/ATP5F1D/SCD5/RPL28/NHP2/SLC25A11/VBP1/DSP/EIF4E2/TDRKH/CCDC22/RPL30/STARD3NL/RAB4A/SCN7A/RPS16/PRPS1/SNTB2/CALM3/RPL32/ACOT9/PRDX4/SUOX/RPL36A/RPS26/DNPEP/PPP2R5D/NIPSNAP3A/QPCTL/MBLAC2/LSM3/KRTCAP2/KIAA2013/H2BC18/RPS20/MRPL21/RPL37A/TRIM27/BOLA2/GTPBP1/COX5A/FIS1/RPS11/SERBP1/ARAP1/ZDHHC5/RPL35/RPL26L1/HSPA13/MXRA7/ZC3H7A/AP1B1/NCAPH/HSPA14/MTA1/DNAJC8/TPM4/SLC1A5/RPLP2/RPL34/SMARCE1/MRPS16/SNRPB/RPL22L1/TMEM97/RPAP3/RRM2/XPOT/PAM16/H4C1/MAGT1/RPS25/RIDA/HSPE1/NDUFB7/SH3BGRL/ISOC1/TBRG4/SLC4A1AP/NPC2/CNDP2/JAM3/NTPCR/MRPS17/GET3/CSTB/TLN1/NDUFA13/MRPL3/PRKAA2/LAGE3/MRPS31/TXNDC17/MACROD1/DBT/L1RE1/SNRPA1/POLR3F/APOO/ELOVL/FUCA1/ERG28 |

---

/TMEM65/RPL7A/USP14/ROBO1/CDK7/RCOR1/PURA/MTATP6/CYP2R1/CPSF7/  
CYCS/MRPL49/AVEN/MYDGF/AP2A1/AKAP17A/ACOT8/RPS13/PCID2/RPS19/D  
DX46/TMED3/TTC26/RPS15A/GGH/VAPA/CHTOP/GAR1/UJA52/RPL35A/ERH/R  
PS14/HSD17B11/CDKN2A/RPL27/ENOPH1/CHPT1/PIN4/ABCB1/RPP30/HSPA2/  
DNAJA2/PML/LSM1/ERC1/ABCB7/RAP1GDS1/PTDSS1/RFC5/RPS28/TSPAN6/P  
KN2/ERCC3/MAU2/XP32/RPL24/ACADS/BTF3/AIMP1/TOMM22/MRPS14/PFDN2/  
SYNCRIP/TBCD/RALY/TUBG1/AP2M1/CIAPIN1/HNRNPH3/CAPNS1/WDR45B/TM  
EM205/FABP5/PSMA3/MCCC1/C1QBP/SNRPD3/EIF2B3/RRP1B/COMP/NOB1/C  
OTL1/MRPL38/PSMA1/SOD1/USP46/ZNF207/APP/ZCCHC8/MIS12/BAG2/STX4/P  
LEC/ETNPPL/ABCF1/SGSH/UTP20/FMR1/ODR4/DYNC1I2/PIGT/SMCHD1/TIMM1  
3/DHX15/POLR3A/HLADRB1/NPM3/COX4I1/EIF5A/ATPAF1/MAPK3/RPL31/TIMM  
44/RPL23/MYH6/ANO6/PSEN2/OR1M1/PEF1

P<0.01

FAM186B/TLL12/RPIA/FANCI/PSMC5/SLC6A9/CLPTM1L/LGALS3BP/STIP1/UB  
E2L3/CORO1B/CCDC93/ARPC4/SMARCC1/MYL12B/BCS1L/RPS10/CAP1/ACSF2  
/CFL1/XPNPEP1/PPP4C/OTULINL/NPM1/RPL36/SEC61B/SNRPA/DNAH9/NBAS/  
SMS/UGP2/SEC11A/MTOR/SURF6/SPCS1/DHX29/RPS18/PARG/SRP19/KHDRB  
S1/LARP1/UBQLN2/ERCC6L/ATP6V1D/PPIA/MRPL17/HDDC2/TWF1/SLC35F6/M  
C2R/RPL12/ERP44/RAB10/PFN1/EXOSC8/STRN3/RPL27A/HDAC2/ANKRD13A/R  
PS17/RPUSD3/BST2/TMX4/ORMDL3/DHX37/RPL23A/PSMB2/SMPDL3B/EMC7/D  
UT/NLE1/TMEM177/TRMT1/UBE2V1/CD59/SNU13/ADPGK/TRMT5/SPRYD7/SLC  
25A21/NDUFAF7/PARS2/PSMG1/TFRC/GTF3C5/GPAT4/LARS1/MAP1A/DNAAF5  
/EXOSC6/HTT/CTR9/SHPK/CISD2/DPM1/CKMT1A/HNRNPDL/TFG/EIF5B/SHOC2  
/RPL26/NDUFA5/TMPO/LRRC8A/BZW2/NDUFS7/CDKAL1/GCAT/LIPT2/YWHAB/  
DDX56/TPMT/PPIL4/STUB1/BCKDHA/ERO1B/COPE/TOMM20/MTCH1/ALYREF/S  
CLY/SRPRB/CHUK/ZW10/EEF1E1/CDK5/USP10/SMARCA4/SCFD2/UCHL1/C8orf  
33/SPAG9/RMND1/PAK4/PABPN1/H33A/MOGS/THOC5/ANAPC4/PTK2/RPL11/T  
MLHE/RPL4/MMTAG2/RPL13/IDH3B/EEF1A2/AP3B1/TXN/GAPVD1/ACAA2/RNG  
TT/MTX1/SLC35A4/PSME3/TACO1/JAGN1/SNX4/GTPBP4/HINT2/SRI/ELP3/RRP  
1/UBE2N/MAGOH/GET1/HDGFL2/PIR/AKAP8L/PFN2/UBE2O/NUTF2/EPB41L5/P  
AXBP1/MYL6/USP24/PLAA/TOP2B/THOC2/TRAPPC3/TIMM22/ZC3H18/FDXR/AR  
L1/DHX16/CTCF/RPS24/MRPS23/WFS1/ANP32E/FASTKD5/APEX1/LARP4B/RPS  
15/DIABLO/CLCN7/MAP7D1/ANKRD29/PDCD6/GLMN/DNPH1/LDHA/SMC4/FER  
MT2/LAS1L/PRDX6/LAMP2/NUDC/LAMTOR1/NIP7/KDSR/PSMC2/JAK3/LMNA/LM  
BR1/NCAPD2/RPS12/VPS52/CTBP1/NUCB2/XAB2/PGM2L1/CSNK2A1/PEX11B/G  
CLM/DHRS7B/ARPC3/PSMD6/ADAR/TBCA/ETFA/PHAX/IDH3G/ACTR1B/AFDN/L  
MF2/CDH2/YKT6/VARS2/CHD4/NAA50/SEPTIN3/UGDH/CPOX/MRPL28/DDX10/O  
RC5/DLAT/PHB/MRPS22/TSN/KIFC1/FTL/ENPP4/CTNND1/PSMA5/GTPBP10/RP  
L22/AFG3L2/MGME1/RPA2/CCAR2/CDC73/OGFR/SLC27A4/MRPS5/SERPINH1/I

---

GSF8/POFUT1/CHP1/SNRPB2/SLC25A23/PSMD7/BLMH/SRP14/RBM4/SUPV3L1  
/BCKDHB/POLR2C/RUVBL1/EXOSC5/CD81/SCG2/ACSF3/CTSC/ELOB/ABRAXA  
S2/EPB41/SLC25A24/ARF4/HARS1/MICAL1/DNAH11/NUDT21/SSR4/DERL1/GDI  
2/NAXE/ANXA2/PFKL/PTTG1IP/C7orf50/POLRMT/SLC25A17/POFUT2/LYPLAL1/  
ESYT2/INTS8/SRPRA/TRIM28/MPI/RPRD1A/MED23/BZW1/MRPL11/EIF3F/HAND  
2/AGTRAP/NME1/TMCO1/NME2/PITHD1/SARS1/MTDH/MAP1S/TXNL1/ATP5P/R  
NASET2/COPS5/TCEA1/PEX14/ATL1/GNPDA1/NUP93/TMEM109/AK4/CACYBP/  
GSTM2/TEX10/ACAT2/DCUN1D5/TMEM33/WLS/PKM/DNAJB11/DDX42/LIG4/HN  
RNPH1/GINS2/NUP85/UBE2I/CSNK2A2/SLC7A6/DHX36/ABHD10/NOC3L/MRE11  
/ATAD3B/HEATR1/ECHS1/SSBP1/COQ9/MDH2/IP6K1/SIGMAR1/MCM7/EIF6/PN  
P/PLCD3/EIF1AX/MRPL23/MR11/CLN5/CFL2/SPCS3/RAB18/CTSD/VRK3/BCAP29  
/SF3A3/SURF4/PEBP1/MAPK14/TXNRD2/LYAR/ACIN1/TMEM70/SAAL1/ARHGAP  
1/DNAJC13/DCP2/SRP72/GID8/APEH/NUDCD1/SNX5/CDK4/AGBL2/GOT2/MAIP  
1/SLTM/PPIB/ACP1/TBCE/GPAT3/CENPF/GORASP2/TMED10/INTS3/PGM3/NHL  
RC2/GAK/MRPS25/CAB39/PLS3/PNO1/ANP32A/LPCAT1/HNRNPC/NOL9/MLYCD  
/GCDH/OAT/NUP54/PDIA6/RBMXL1/DCTPP1/RBMX/ITPR2/WBP2/ATP5MF/PDX  
P/DSTN/RDH10/IQGAP2/TMED5/DNAJC10/GCC2/RMDN3/RPL1/RTN1/HSPA9/F  
AF2/RANBP9/ATP5F1A/RAP2A/GDPD1/PPAN/SLC25A6/GOLGB1/MRPL37/WRNI  
P1/SFXN4/VIM/CD151/PMPCA/RBFOX2/UBE2D3/COG1/UBE2R2/MYADM/VAC14  
/SLC9A3R1/PPME1/GALNT1/MCMBP/PTBP1/RSL1D1/SYNE2/CEBPZ/RAB2A/DY  
NLL1/ABRACL/ASPH/SRRT/RAB9A/SERPINB6/CCDC51/RHOB/PARK7/PSMB6/S  
LC29A1/EARS2/HSPB1/RBM39/STT3A/ARGLU1/PUF60/PCMT1/ERCC1/HACD3/T  
MED1/UFC1/NAT10/DNAJB1/CNP/NDUFB10/DGUOK/PODXL/PRDX5/NOC2L/MA  
NF/APOA1/AP2S1/CYC1/SUPT5H/MRPL10/PPIH/**ONECUT3**/DNAAF10/LUC7L3/M  
AD2L1/GOLT1B/KCTD12/SAE1/TMEM192/AHSA1/RPL38/ARL6IP5/CSTF2/RPL17  
/RPN1/CD9/GYS1/CLPTM1/TSPO/GTF3C2/RAB12/MYBBP1A/RAB8A/PPOX/RIPK  
1/PTRH2/CDK11B/CHERP/MRPS26/SNX8/NDUFS2/EEF1B2/OLA1/RBMS1/SEC2  
2B/UBE2S/PDLIM5/PHB2/HEXB/UPF3B/BPHL/HSCB/PAPOLA/U2AF1/TOMM70/P  
SMC3/HADHB/PRCP/PGAM5/TRIM33/ALDH3A2/DCTN2/ZNF326/TOR1AIP1/POL  
DIP2/SAP18/ARIH2/SEC24B/FLOT2/RPL6/FAM98B/PPP3CA/NEMF/RAB11B/PEL  
P1/PDPR/DCD/ATP6V1A/ERGIC1/IARS1/RCC1/ATP5F1B/NT5C3A

P<0.05

QPRT/NAA10/RP2/ATP5PB/FAM50A/ARL6IP1/YTHDF2/TPI1/SAMHD1/USP9X/PR  
C1/TIAL1/TBCB/COPA/GABARAP/OXA1L/AP1M1/UQCRC2/CCT3/DDX31/SMPD4  
/NUP205/EIF3K/FARS2/ERMP1/CCDC33/RRAGC/RPL39/TBL3/AGK/FBL/SFXN1/  
SLC12A4/UBLCP1/PSMC4/OSBP/NOP56/MRPS10/UBE2T/SNX17/NOP58/DDX51  
/ENAH/EXOSC2/MRPL13/STXBP2/EHD4/XPO7/ACP6/LZIC/MBOAT7/H1-3/  
TNPO1/SLC39A14/POLR2H/EIF4G1/LTA4H/BRI3BP/PI4K2A/THEM6/SNX9/OPA1/  
HEXA/OGFOD1/GCA/HS2ST1/UBE2M/AK6/SUMO1/CS/GTF2H2/PCK2/FARSA/A

CP2/ELAVL1/MTCO2/MRPL20/SOAT1/ATP6V1B2/SF3B6/POLR2A/PSME4/AKR1  
 B1/WDR70/U2AF2/ILF2/MRPL18/S100A13/CCNT1/TTC1/ANKRD28/TPR/CENPH/  
 HNRNPU/NAGK/COPS8/TBC1D4/TMF1/ACSL4/DNMT1/CAB39L/GLUD1/SNRPD2  
 /TIMMDC1/HSPBP1/GSS/PPP4R3A/PTP4A1/COPZ1/PHGDH/SLC25A3/SEPTIN7/  
 DHX8/DCXR/EMC3/FUBP3/CCNK/TRMT1L/RAB5C/OXSR1/DHX30/CPSF2/MDH1/  
 CFAP20/MTHFS/LIMS1/WASHC5/AP1S2/RWDD1/GRPEL1/TAMM41/APRT/DYNC  
 1H1/COX15/BTF3L4/CBR1/RNASEH2B

284

285

**Supplemental Table 8. Antibody information in this study**

| Antibody                                                                                  | Source                       | CAT#                                  |
|-------------------------------------------------------------------------------------------|------------------------------|---------------------------------------|
| FITC anti-human CD2                                                                       | Biologend                    | 300206                                |
| FITC anti-human CD3                                                                       | Biologend                    | 300305                                |
| FITC anti-human CD7                                                                       | Biologend                    | 343104                                |
| FITC anti-human CD10                                                                      | Biologend                    | 312207                                |
| FITC anti-human CD11b                                                                     | Biologend                    | 301329                                |
| FITC anti-human CD14                                                                      | Biologend                    | 325603                                |
| FITC anti-human CD19                                                                      | Biologend                    | 302205                                |
| FITC anti-human CD235a                                                                    | Biologend                    | 349103                                |
| PB anti-human CD38                                                                        | Biologend                    | 356627                                |
| APC anti-human CD34                                                                       | Biologend                    | 343509                                |
| Anti-ONECUT3                                                                              | homemade                     | detailed in<br>Supplemental<br>Method |
| Anti-INCENP                                                                               | Abcam                        | ab12183                               |
| Anti-Aurora B                                                                             | Abcam                        | ab2254                                |
| Anti-Borealin                                                                             | Santa Cruz                   | sc-376635                             |
| Anti-Borealin/CDCA8                                                                       | Proteintech                  | 12465-1-AP                            |
| Anti-Survivin                                                                             | Huabio                       | ET1602-43                             |
| Anti- $\alpha$ -Tubulin                                                                   | Sigma                        | T6199                                 |
| Anti-Tubulin                                                                              | Abcam                        | ab6161                                |
| Anti-Histone H3 (phospho S10)                                                             | Abcam                        | ab5176                                |
| Anti-Flag                                                                                 | Sigma                        | F3165                                 |
| Anti-Lamin B1                                                                             | Abcam                        | Ab160488                              |
| Goat Anti-rabbit IgG (H+L),<br>F(ab') <sub>2</sub> Fragment, Alexa Fluor 488<br>Conjugate | Cell Signaling<br>Technology | s4412                                 |
| Goat anti-Mouse IgG (H+L), TRITC                                                          | Invitrogen                   | A16071                                |
| Goat Anti-rat IgG (H+L), F(ab') <sub>2</sub> Fragment,                                    | Cell Signaling               | s4414                                 |

286

287

**Supplemental Table 9. Chemical reagents in this study**

| Chemical Reagent          | Source     | CAT#       |
|---------------------------|------------|------------|
| Puromycin                 | InvivioGen | ant-pr-1   |
| Doxycycline               | Selleck    | S5159      |
| 5-fluorouracil (5-FU)     | Selleck    | S1209      |
| Nocodazole                | Selleck    | S2775      |
| Barasertib (AZD1152-HQPA) | Selleck    | S1147      |
| C5484617                  | Chembridge | 5484617    |
| Azacitidine               | Sigma      | A2385      |
| Decitabine                | Sigma      | A3656      |
| Vincristine sulfate       | Selleck    | S1241      |
| Doxorubicin               | Pfizer     | NSC-123127 |

288

289

**Supplemental Table 10. Sequences of primers used for the TP53 genotype**

| Name                   | Sequence               |
|------------------------|------------------------|
| Tp53 Common            | TGGATGGTGGTATACTCAGAGC |
| Tp53 Mutant Forward    | CAGCCTCTGTTCCACATACT   |
| Tp53 Wild type Forward | AGGCTTAGAGGTGCAAGCTG   |

290

291

**Supplemental Table 11. Sequences of primers used for the constructs of overexpression**

292

**plasmids**

| Name                              | Sequence                                                |
|-----------------------------------|---------------------------------------------------------|
| Retro-ONECUT3-Full<br>Forward     | length-3FLAG CGGAATTCGCCACCATGGAGCTGAGCC                |
| Retro-ONECUT3-Full<br>Reverse     | length-3FLAG TGAGATCTGACGGGCACCGGAGCGATCGC              |
| Retro-ONECUT3-Truncated 1 Forward | TCCTACCCTCGTAAAGAATTCGCCACCATGGAGCT<br>GAGCCTGGAGAGCCTG |
| Retro-ONECUT3-Truncated 1 Reverse | GAAGGGCCCTCTAGACTCGAGTTCGAACATGCGCT<br>GGA ACTCTGGCTC   |
| Retro-ONECUT3-Truncated 2 Forward | TCCTACCCTCGTAAAGAATTCGCCACCATGGAGCT<br>GAGCCTGGAGAGCCTG |
| Retro-ONECUT3-Truncated 2 Reverse | GAAGGGCCCTCTAGACTCGAGTTCGAACTGCAGG                      |



|                                   |                                                                             |
|-----------------------------------|-----------------------------------------------------------------------------|
|                                   | GCGCGCTCCTTCTG                                                              |
| Retro-ONECUT3-Truncated 3 Forward | TCCTACCCTCGTAAAGAATTCGCCACCATGTCCGGC<br>GCTGCGCTTGGCAGCC                    |
| Retro-ONECUT3-Truncated 3 Reverse | GAAGGGCCCTCTAGACTCGAGTTCGAAGGCCTTG<br>GAGAAAGTGGCCGT                        |
| Retro-ONECUT3-Truncated 4 Forward | TCCTACCCTCGTAAAGAATTCGCCACCATGCCCAA<br>GAAGCAGCGCCTGGTG                     |
| Retro-ONECUT3-Truncated 4 Reverse | GAAGGGCCCTCTAGACTCGAGTTCGAAGGCCTTG<br>GAGAAAGTGGCCGT                        |
| MSCV-ONECUT3-D358A Forward 1      | CTCCTTCTCTAGGCGCCGGAATTCGCCACCATGGAG<br>CTGAGCCTGGAGAGC                     |
| MSCV-ONECUT3-D358A Reverse 1      | GGGGTTGCGCAGCAGAGCGGAGAGCGT                                                 |
| MSCV-ONECUT3-D358A Forward 2      | CAGGGCACGCTCTCCGCTCTGCTGCGC                                                 |
| MSCV-ONECUT3-D358A Reverse 2      | ATCCCGCTCGAGCAATTGGGATCCGGCTGATCAGCG<br>GGTTTAAACTCACTTGTTCATCGTCATCCTTGTAG |
| MSCV-ONECUT3-K364A Forward 1      | CTCCTTCTCTAGGCGCCGGAATTCGCCACCATGGAG<br>CTGAGCCTGGAGAGC                     |
| MSCV-ONECUT3-K364A Reverse 1      | ATTTGAGCTTGCTCCACGGAGCGGGGTTGC                                              |
| MSCV-ONECUT3-K364A Forward 2      | CTGCTGCGCAACCCCGCTCCGTGGAGC                                                 |
| MSCV-ONECUT3-K364A Reverse 2      | ATCCCGCTCGAGCAATTGGGATCCGGCTGATCAGCG<br>GGTTTAAACTCACTTGTTCATCGTCATCCTTGTAG |
| MSCV-ONECUT3-K370A Forward 1      | CTCCTTCTCTAGGCGCCGGAATTCGCCACCATGGAG<br>CTGAGCCTGGAGAGC                     |
| MSCV-ONECUT3-K370A Reverse 1      | GGTCTCGCGGCCGGAAGCGAGCTT                                                    |
| MSCV-ONECUT3-K370A Forward 2      | CCGTGGAGCAAGCTCGCTTCCGGC                                                    |
| MSCV-ONECUT3-K370A Reverse 2      | ATCCCGCTCGAGCAATTGGGATCCGGCTGATCAGCG<br>GGTTTAAACTCACTTGTTCATCGTCATCCTTGTAG |
| MSCV-ONECUT3-K364A Forward 1      | CTCCTTCTCTAGGCGCCGGAATTCGCCACCATGGAG<br>CTGAGCCTGGAGAGC                     |
| MSCV-ONECUT3-K364A Reverse 1      | CTCCTCAGCCCAAGCGTTCATGCAGCG                                                 |
| MSCV-ONECUT3-K364A Forward 2      | ATGAACGCTTGGGCTGAGGAGCCC                                                    |
| MSCV-ONECUT3-K364A Reverse 2      | ATCCCGCTCGAGCAATTGGGATCCGGCTGATCAGCG<br>GGTTTAAACTCACTTGTTCATCGTCATCCTTGTAG |

293

294

**Supplemental Table 12. Sequences used for the ONECUT3 genotype in HSPC**

| Name            | Sequence                 |
|-----------------|--------------------------|
| ONECUT3-Forward | TGTGAAATTTGTGATGCTATTGCT |
| ONECUT3-Reverse | AGCGTTTGGCAATGTGCTTT     |

295

296

**Supplemental Table 13. Sequences of SiRNA**

| Name                   | Sequence              |
|------------------------|-----------------------|
| SiRNA-Incenp sense     | CUCCUAUCCUGCUGAAUAATT |
| SiRNA-Incenp antisense | UUAUUCAGCAGGAUAGGAGTT |
| SiRNA-NC sense         | UUCUCCGAACGUGUCACGUTT |
| SiRNA-NC antisense     | ACGUGACACGUUCGGAGAATT |

297

298

**Supplemental Table 14. Sequences of primers used for Real-time PCR**

| Name                  | Sequence                 |
|-----------------------|--------------------------|
| Human ACTIN Forward   | ACTCTTCCAGCCTTCCTTCC     |
| Human ACTIN Reverse   | AGCACTGTGTTGGCGTACAG     |
| Human ONECUT3 Forward | CGGATCCTGTGTCGCTCT       |
| Human ONECUT3 Reverse | CACATCCTGCGGAAGGTCTC     |
| Human INCENP Forward  | AAGCTCATGGAGTTTCTCTGC    |
| Human INCENP Reverse  | CGTCTCTTCTCCGTCGGTTC     |
| Human CDCA8 Forward   | GCAGGAGAGCGGATTTACAAC    |
| Human CDCA8 Reverse   | CTGGGCAATACTGTGCCTCTG    |
| Human AURKB Forward   | CACATTTGACGAGCAGCGAAC    |
| Human AURKB Reverse   | CACATTGTCTTCCTCCTCAGGG   |
| Human BIRC5 Forward   | AGGACCACCGCATCTCTACAT    |
| Human BIRC5 Reverse   | AAGTCTGGCTCGTTCTCAGTG    |
| Mouse Actin Forward   | TGTACCCAGGCATTGCTGAC     |
| Mouse Actin Reverse   | AACGCAGCTCAGTAACAGTCC    |
| Mouse Onecut3 Forward | CGGATCCTGTGTCGCTCT       |
| Mouse Onecut3 Reverse | CACATCCTGCGGAAGGTCTC     |
| Mouse Incenp Forward  | GAGGCTGAGCGCATGTTTATC    |
| Mouse Incenp Reverse  | CCTCACGGGATCTCTGTTTTTC   |
| Mouse Cdca8 Forward   | AAAAGCGAAAGGTAATCGAGGT   |
| Mouse Cdca8 Reverse   | TGCAGATCGAAGATTCTTATGGC  |
| Mouse AurkB Forward   | ATCGGGGTGCTCTGCTATGAAC   |
| Mouse AurkB Reverse   | GTTGCCAGGGGTTATGTTTTGAG  |
| Mouse Birc5 Forward   | AGAACAAAATTGCAAAGGAGACCA |
| Mouse Birc5 Reverse   | GGCATGTCACTCAGGTCCAA     |
| Mouse P53 Forward     | CTCTCCCCCGCAAAGAAAAA     |
| Mouse P53 Reverse     | CGGAACATCTCGAAGCGTTTA    |
| Muse Cdkn1a Forward   | CGGTGTCAGAGTCTAGGGGA     |

|                      |                         |
|----------------------|-------------------------|
| Mouse Cdkn1a Reverse | ATCACCAGGATTGGACATGG    |
| Mouse Bax Forward    | GTGAGCGGCTGCTTGTCT      |
| Mouse Bax Reverse    | GGTCCCGAAGTAGGAGAGGA    |
| Mouse Phlda3 Forward | CCGTGGAGTGCGTAGAGAG     |
| Mouse Phlda3 Reverse | TCTGGATGGCCTGTTGATTCT   |
| Mouse Pten Forward   | TGGATTGACTTAGACTTGACCT  |
| Mouse Pten Reverse   | GCGGTGTCATAATGTCTCTCAG  |
| Mouse Zmat3 Forward  | TTCCTTTACCTAATCGGCCTTCA |
| Mouse Zmat3 Reverse  | TTCCTGCCCAAAGCCTTCTG    |

299

300

**Supplemental Table 15. Sequences of primers used for ChIP-qPCR**

| Name                          | Sequence             |
|-------------------------------|----------------------|
| Human INCENP TSS-216 Forward  | ATCTACTTCTCTCTCGGCC  |
| Human INCENP TSS-216 Reverse  | CCAATCCTCGGCAAGTTTGT |
| Mouse Incenp TSS +755 Forward | CAGACTCATCCCCAGCTCTC |
| Mouse Incenp TSS +755 Reverse | ATTCCTCACTTCTCCCACCC |
| Mouse Cdca8 TSS +4391 Forward | CGATTGTTGGTTGCTGGAGT |
| Mouse Cdca8 TSS +4391 Reverse | TCCTCACACTGGCACTCAAG |

301

302

303

304

305

306

307

308

309

310

311

312

313

314

315

316 **SUPPLEMENTAL METHODS**

317 **Patient samples**

318 BM samples were collected from 31 hematopoietic stem/progenitor cell (HSPC) donors and 165  
319 newly diagnosed MDS patients with *TP53* wild type according to the Declaration of Helsinki.  
320 Informed consent was obtained from all subjects, and the procedures related to primary human  
321 samples were approved by the Research Ethics Committee of the First Affiliated Hospital,  
322 Zhejiang University School of Medicine (Reference number: 2020-458). Genomic DNA was  
323 extracted from the BM mononuclear cells. Targeted Panels with 37 genes frequently mutated in  
324 MDS were conducted by targeted next-generation sequencing (NGS). These genes included  
325 *ASXL1, BCOR, CBL, CEBPA, CREBBP, CSF3R, CUX1, DNMT3A, EP300, ETV6, EZH2, FLT3,*  
326 *GATA1, GATA2, IDH1, IDH2, JAK2, KIT, KMT2D, KRAS, NPM1, NRAS, PHF6, PTPN11, RUNX1,*  
327 *SETBP1, SF3B1, SRSF2, TET2, TP53, U2AF1, WT1, and ZRSR2.*

328

329 **Primary MEF cells, Human CD34+ HPSC and cell line culture**

330 Tp53 WT (C57BL/6) mice, Tp53 KO (jax002101, B6.129S2-Trp53tm1Tyj/J, -/-) male mice, and  
331 Tp53 KO (jax002101, B6.129S2-Trp53tm1Tyj/J, +/-) female mice were purchased from Jackson  
332 Lab. All mice were bred and housed in specific pathogen-free conditions in the animal barrier  
333 facility at Zhejiang Academy of Medical Science, China. And the procedures related to animals  
334 were approved by Animal Experimental Ethical Inspection of the First Affiliated Hospital, Zhejiang  
335 University School of Medicine (Reference number: 2019-432). Primary mouse embryonic  
336 fibroblast (MEF) cells were established and cultured using the standard protocol. MEF cells were  
337 isolated from E13.5 embryos obtained from heterozygote breeding. Each embryo was genotyped  
338 and individually processed for primary culture. Primers for the Tp53 genotype are listed in  
339 Supplemental Table 10. The primary MEF cells were cultured in DMEM containing 10% fetal  
340 bovine serum (FBS), 1% Penicillin/Streptomycin, 1x Sodium Pyruvate (Gibco, USA), 1x MEM  
341 Non-Essential Amino Acids Solution (Gibco, USA) and 1x GlutaMAX Supplement (Gibco, USA).  
342 And the cells were passaged when the cell confluency reached about 80%-90%. Primary MEF  
343 were used for a maximum of five passages.

344

345 Human CD34+ HPSCs was purchased from Saily Biotechnology Co., Ltd. CD34+ HPSCs were  
346 seeded onto a six well plate at a density of  $0.8-1.0 \times 10^6$  cells per ml. of SCGM (CellGenix,  
347 #20802-0500), supplemented with three recombinant growth factors of human stem cell factor  
348 (100 ng/ml, PEPROTECH, #300-07), Flt3 ligand (100 ng/ml, PEPROTECH, #300-19) and  
349 thrombopoietin (100 ng/ml, PEPROTECH, #300-18).

350

351 MOLM13, HL-60, HEK293T, and Platinum-E (Plat-E) cell lines were ordered from The American  
352 Type Culture Collection (ATCC) and authenticated by short tandem repeat (STR) profiling. The  
353 culture conditions of MOLM13 were IMDM medium plus 10% FBS and 1%  
354 Penicillin/Streptomycin. HL-60 were cultured in 1640 medium plus 10% FBS and 1%  
355 Penicillin/Streptomycin. HEK-293T was cultured in DMEM medium plus 10% FBS and 1%  
356 Penicillin/Streptomycin. Platinum-E (PlatE) cells were cultured in DMEM containing 10% Heat-  
357 inactivated FBS, 1% Penicillin/Streptomycin, 1x GlutaMax, 1  $\mu\text{g}/\text{mL}$  Puromycin, and 10  $\mu\text{g}/\text{mL}$   
358 Blasticidin S HCl. These drugs were removed before the transfection. The above cells were  
359 cultured in a 37°C, 5% CO<sub>2</sub> incubator.

360

### 361 **Plasmids of ONECUT3-OE, transfection, and transduction**

362 ORF clone of human *ONECUT3* (NM\_001080488.2) was originally synthesized in the pcDNA3.1  
363 vector. pRetroX-TetOne system was gifted by Prof. Kosei Ito (Nagasaki University, Nagasaki,  
364 Japan). The full-length, truncated mutants and point mutants of *ONECUT3* were amplified with  
365 PCR using the listed primers (Supplemental Table 11) and subcloned into Retro-X-TET-ON  
366 system using the BamHI and EcoRI restriction enzyme. Retroviruses were generated by calcium  
367 phosphate transient transfection of the retroviral plasmids into PlatE cells. The supernatant was  
368 harvested at 48 hours and 72 hours and filtrated with a 0.45  $\mu\text{m}$  filter. MEF cells, MOLM13 and  
369 HL-60 were plated in a 6-well plate one day before the transduction. On the day of transduction,  
370 a fresh medium and retroviral supernatant was added. Polybrene was used at the final  
371 concentration of 4  $\mu\text{g}/\text{ml}$ . Puromycin (0.5-1  $\mu\text{g}/\text{ml}$ ) was used for selection to generate stable cell  
372 lines and ONECUT3 expression was induced by the doxycycline (100 ng/ml).

373

374 **Single-stranded oligodeoxynucleotide (ssODN)-mediated ONECUT3 expression in human**  
375 **CD34+ hematopoietic stem/progenitor cells (HSPCs)**

376 To integrate *ONECUT3* targeting at *CCR5* locus (1), we constructed the enhanced GFP (EGFP)  
377 linked to *ONECUT3* expression cassettes driven by PGK promoter and terminated by an SV40  
378 polyA (pA). The EGFP-*ONECUT3* cassette was flanked by sequence homologous arms to *CCR5*,  
379 at which the single guide RNA (sgRNA, 5'-GCCCAGTGGGACTTTGGAAAT-3') targeted.  
380 Nucleotide sequence of the PGK-EFP-*ONECUT3*-pA with *CCR5* homologous arms was  
381 annealed as ssODN by GeneScript Inc. Sequences and maps of the relevant parts were  
382 available in Supplemental Figure 2A.

383

384 To achieve efficient genome editing in human CD34+ HPSCs (Saily Biotechnology Co., Ltd.), the  
385 optimizing MaxCyte electroporation condition was used to introducing CRISPR/Cas9 system.  
386 Two days before electroporation, CD34+ HPSCs were seeded onto a six well plate at a density  
387 of  $0.8\text{-}1.0 \times 10^6$  cells per ml. of SCGM (CellGenix, #20802-0500), supplemented with three  
388 recombinant growth factors of human stem cell factor (100 ng/ml, PEPROTECH, #300-07), Flt3  
389 ligand (100 ng/ml, PEPROTECH, #300-19) and thrombopoietin (100 ng/ml, PEPROTECH, #300-  
390 18). On the day of electroporation, CD34+ HPSCs were washed with MaxCyte buffer, and  
391 resuspended in MaxCyte buffer at a density of  $5 \times 10^7$  cells/mL. Then 10  $\mu\text{g}$  Cas9 mRNA  
392 (Thermo Fisher, #A29378) and 16  $\mu\text{g}$  *CCR5* sgRNA were incubated for 5 min at room  
393 temperature, and then  $2.5 \times 10^6$  cells with 50  $\mu\text{L}$  MaxCyte buffer and 8  $\mu\text{g}$  ssODN were added  
394 and mixed gently before transfer to an OC-100 cuvette (MaxCyte, #GOC-1). Immediately after  
395 electroporation, the OC-100 cuvettes with HSPCs mixture were incubated at 37°C for 20 mins in  
396 a humidified incubator to allow for cell membrane recovery. Finally, cells were added to a six well  
397 plate containing 2.5 mL SCGM with three recombinant growth factors as below. Semi-confluent  
398 cells (3–4 days after transfection) were harvested for genomic DNA extraction and/or FACS  
399 analysis. To detect *ONECUT3*-targeted integration in *CCR5* locus, genomic DNA of 40–200 ng  
400 was analyzed by PCR using primers indicated in Supplemental Table 12. PCR amplicons were  
401 resolved on 0.8% agarose gel and visualized by ethidium bromide staining.

402

403 **The silencing and overexpression of *Incenp***

404 Transient knockdown of *Incenp* was performed using siRNAs targeting mouse *Incenp* or  
405 nontargeting siRNA (Supplemental Table 13), delivered by RFect siRNA Transfection Reagent  
406 (BAIDAI, Cat#11013). ORF clone of *Mus musculus Incenp* (NM\_016692.4) was originally  
407 synthesized in the pMSCV-IRES-GFP II (pMIG II) vector and subcloned into Retro-X-TET-ON  
408 system using the BamHI and EcoRI restriction enzyme. The transfection process for packaging  
409 retroviruses and subsequent transduction into MEF cells was conducted as above described.

410

411 **The generation of Anti-ONECUT3 Antibody**

412 Anti-ONECUT3 Antibody was prepared by immunizing rabbits with peptide  
413 CMNRWAEEPSTATPG (amino acids 469-482 of human ONECUT3, UniProtKB-O60422)  
414 conjugated with keyhole limpet hemocyanin (KLH). The antibody was then purified from rabbit  
415 antiserum by the affinity chromatography columns. The procedures of immunization and  
416 purification were conducted in Huabio Inc. (Hangzhou, China). In addition, we confirmed the  
417 specificity of the antibody by the blocking peptide competition assay and knock-down experiment.  
418 The described peptide sequence for generating rabbit anti-ONECUT3 antibody is under China  
419 patent application and PCT application (application No. 202111542061.7).

420

421 **Protein purification of ONECUT3**

422 The procedures of the protein purification of ONECUT3 were conducted in Huabio Inc.  
423 (Hangzhou, China). The codon-optimized sequence of the human *ONECUT3* gene  
424 (NM\_001080488.2) was synthesized and inserted into the pET-28a (+) vector for expression in  
425 Rosetta (DE3) cells. To obtain inclusion body proteins, the bacterial strain was initially inoculated  
426 in LB medium and grown at 37°C and 220 rpm until the optical density at 600 nm (OD600)  
427 reached 0.4-0.6. Subsequently, 1.0 mM IPTG was added to induce the expression of the fusion  
428 protein, and the cultivation was continued at 37°C and 220 rpm for 4 hours. The collected  
429 bacteria were subjected to centrifugation, followed by resuspension of the resulting pellet in  
430 1xPBS. The cells were then disrupted through sonication, and another round of centrifugation at  
431 12000 rpm for 5 minutes was performed to separate the supernatant containing soluble proteins

432 from the pellet containing inclusion bodies. Each fraction was sampled and subsequently  
433 analyzed using SDS-PAGE. The inclusion body proteins were purified using Ni-Smart affinity  
434 chromatography, employing the following steps: the column was washed with deionized water,  
435 and then equilibrated with denaturing equilibration buffer (20 mM PB, 8M Urea, 0.5 M NaCl, pH  
436 7.4). The sample was loaded twice onto a column and collected using a flow-through method.  
437 Subsequently, the column was washed three times with deionized water, followed by 0.5M NaOH,  
438 and then deionized water again. Finally, the column was equilibrated with 20% ethanol for  
439 storage purposes. The loading samples were obtained from the wash fraction and elution fraction  
440 after equilibration, with 20  $\mu$ l reserved for SDS-PAGE analysis. A suitable elution fluid was  
441 selected for gradient dialysis, and the target protein was concentrated using an ultrafiltration tube.  
442 Ultimately, the protein was preserved in a solution of 1xPBS, 10% Glycerol, pH 7.4.

443

#### 444 **Surface Plasmon Resonance (SPR)**

445 Surface Plasmon Resonance (SPR) experiments were conducted using a BIAcore T200 (Cytiva)  
446 instrument by Target Pharmaceutical (Shanghai) co., Ltd. The CM5 chip (Cytiva) was employed,  
447 and a solution containing 50 mM N-hydroxysuccinimide (NHS) and 200 mM 1-ethyl-3-(3-  
448 dimethylaminopropyl) carbodiimide (EDC) was introduced onto the sensor surface for a duration  
449 of 7 minutes to activate it. Subsequently, the target purified protein ONECUT3 was diluted to a  
450 concentration of 20  $\mu$ g/mL in 10 mM Acetate pH 5.5, with a flow rate of 10  $\mu$ L/min and a duration  
451 of 420 s and immobilized on the CM5 chip surface. Finally, the surface was blocked using 1 M  
452 ethanolamine (pH 8.5).

453

454 The preliminary determination and manual evaluation of the binding characteristics between the  
455 target protein ONECUT3 and the small molecule compound C5484617 were conducted. The  
456 highest analytical concentration for the compound was determined to be 12.5  $\mu$ M. Subsequently,  
457 the compound was diluted in a 2-fold gradient, resulting in 8 analytical concentrations ranging  
458 from 0  $\mu$ M to 12.5  $\mu$ M. The sample analysis was performed with a flow rate of 30  $\mu$ L/min, a  
459 binding time of 120 s, and a dissociation time of 240 s. The experiment was carried out  
460 employing multiple cycles, wherein the response signal was graphed against analysis time. The



461 acquired data were subjected to fitting using the BIAcore T200 analysis software, employing a  
462 1:1 Langmuir binding model to ascertain kinetic constants such as the association rate constant,  
463 dissociation rate constant, and binding and dissociation equilibrium constants.

464

#### 465 **Drug Affinity Responsive Target Stability (DARTS) for target identification**

466 The target identification of the small-molecule C5484617 were conducted using Drug Affinity  
467 Responsive Target Stability by Target Pharmaceutical (Shanghai) co., Ltd. The protocol is as  
468 reference (2) . 293T cells were lysed in M-PER buffer with the addition of both protease inhibitors  
469 and phosphatase inhibitors. After chilled TNC buffer (50 mM Tris-HCl pH 8.0, 50 mM NaCl, 10  
470 mM CaCl<sub>2</sub>) was added to the protein lysate, the protein concentration of the lysate was  
471 measured by the BCA Protein Assay kit (Pierce, 23227). The protein lysate was then incubated  
472 for 1 hours at room temperature with either vehicle control (DMSO) or 100 μM compound  
473 C5484617; materials were shaken at 600 rpm in an Eppendorf Thermomixer. Pronase digestions  
474 (1:200), which were performed for 30 min at room temperature, were stopped by adding SDS  
475 loading buffer and immediately heating at 70 °C for 10 min. Samples were both subjected to  
476 SDS-PAGE.

477

478 For the decolorization of the gel strip, the reduction and alkylation process involved the use of  
479 DTT and Iodoacetimide. Subsequently, a trypsin enzyme solution was introduced, and the  
480 mixture was kept at a temperature of 4°C for a duration of 60 minutes, followed by overnight  
481 digestion at 37°C. To extract the digested peptides, a blend of formic acid and acetonitrile was  
482 prepared and subjected to ultrasonic treatment at 37°C. The resulting mixture of peptides was  
483 then dried and reconstituted in a 0.1% formic acid (FA) solution. After vacuum drying, the sample  
484 was dissolved in FA once again, and an equal volume of the sample was extracted for mass  
485 spectrometry analysis using the Q-Exactive HF system (Thermo Scientific, USA). The sample  
486 was subjected to separation using the EASY-nLC 1200 system (Thermo Scientific, USA),  
487 employing a C18 analytical column (1.9μm particle size, 75 μm×15 cm) at a flow rate of 300  
488 nL/min. Subsequently, tandem mass spectrometry detection was performed in Data Dependent  
489 Acquisition (DDA) mode.

490

491 **Protein extraction and immunoblotting**

492 The cell pellet was resuspended in SDS lysis buffer (50 mM Tris-HCl pH 6.8, 2% SDS, 10%  
493 glycerol, 2%  $\beta$ -mercaptoethanol and 0.02 % bromophenol blue) with Protease Inhibitor (Abcam)  
494 PhosSTOP plus Phosphatase Inhibitor Cocktail (Roche) and followed by sonication. Samples  
495 were heated at 95°C for 10min and loaded to SDS-PAGE gel. Followed by electrophoresis,  
496 transfer-membrane, and blocking, the primary antibodies were incubated at 4 °C overnight. The  
497 following primary antibodies (listed in Supplemental Table 8) were used in this study: anti-FLAG  
498 (Sigma, F3165), anti-INCENP (Abcam, ab12183), anti-Aurora B (Abcam, ab2254), anti-Borealin  
499 (Santa Cruz, sc-376635) and anti-Survivin (Huabio, ET1602-43). In addition, diluted horseradish  
500 peroxidase (HRP)-conjugated secondary antibodies were incubated for one hour at room  
501 temperature, and SuperSignal West Dura or Femto Chemiluminescent Substrate (Thermo Fisher)  
502 were used for ECL detection. The membranes were imaged and visualized in ChemiDoc MP  
503 Imaging System with ImageLab 5.0 software (Bio-Rad). Protein bands were quantified by  
504 measuring the peak area via ImageJ (NIH).

505

506 **Analysis of cell viability, colony formation assay, apoptosis, and necrosis**

507 0.3 M cells were plated in each well of 6-well plates for three replicates, and the overexpression  
508 of ONECUT3 was induced using 100 ng/ $\mu$ l Doxycycline for 0–8 days. The cell number was  
509 counted every two days, and the culture medium was refreshed simultaneously. For drug  
510 treatment, ten thousand cells were plated in 96-well plates in the presence of the  
511 chemotherapeutic agents (listed in Supplemental Table 9). The plates were incubated at 37 °C  
512 for 48 hours. After the drug treatment, cell viability was measured utilizing the CellTiter-Lumi™  
513 Plus Luminescent Cell Viability Assay Kit (Beyotime, Shanghai, China) according to the protocol.  
514 One thousand MOLM13 cells, after two days of the induction of ONECUT3 overexpression, were  
515 plated in triplicate into 1 ml methylcellulose-based medium (Stem Cell Technologies, MethoCult  
516 GF M3434). After 14 days, the colonies were scored, and images of the representing colonies  
517 were captured by an ECLIPSE E400 microscope (Nikon, Japan). Apoptosis and necrosis were  
518 conducted by Annexin V-APC/7-AAD staining Kit (BD, 550474). Flow cytometry was performed

519 on a BD FACS-Canto II Flow Cytometer (BD) and analyzed with FlowJo 10.3 (TreeStar).

520

### 521 **Wright-Giemsa staining**

522 MEF cells were washed with PBS and harvested by trypsin. Place 0.3 M cells (in 100  $\mu$ l medium  
523 per slide) in Cytospin 4 Centrifuge (Thermo Scientific, USA), centrifuge them at 500x rpm for 3  
524 minutes, and dry them at room temperature for 20-30 minutes. The slides were then stained by  
525 Camco Stain Pak (Camco, USA) according to the manual. Briefly, fix them in Fixative Solution for  
526 10 seconds; then dye in Solution I and II for 30 seconds and 20 seconds, respectively. Cell  
527 morphology was photographed in a 100x oil len by an ECLIPSE E400 microscope (Nikon, Japan).

528

### 529 **Total RNA extraction, reverse transcription, and qPCR assay**

530 Total RNA was extracted using Trizol reagent (Invitrogen) and the RNeasy Mini Kit (Qiagen).  
531 Then 1  $\mu$ g of total RNA was reverse transcribed into cDNA using the SuperScript IV First-Strand  
532 Synthesis System (Invitrogen). Primers for qPCR are listed in Supplemental Table 14. Real-time  
533 PCR was conducted using the TB Green Premix Ex Taq (Takara-Bio) on the Applied Biosystems  
534 7500 Fast Real-Time PCR System (Applied Biosystems). The relative mRNA expression level of  
535 each gene was calculated as  $2^{-\Delta\Delta Ct}$  to the internal reference (ACTIN).

536

### 537 **RNA sequencing (RNA-seq)**

538 RNA-seq was conducted by the Genomics, Epigenomics and Sequencing Core of the University  
539 of Cincinnati (Cincinnati, Ohio). NEBNext Ultra II Directional RNA Library Prep Kit was used for  
540 library preparation, and adapter trimmed reads were generated in fastq format. Demultiplexing is  
541 performed under the Illumina BaseSpace default setting. Adapter:  
542 AGATCGGAAGAGCACACGTC; AdapterRead2: AGATCGGAAGAGCGTCGTGT. RNA-seq was  
543 performed using the NextSeq 550 platform (Illumina, San Diego, CA). General bioinformatic  
544 analysis was performed via SEQUENCE HUB app RNA-Seq Alignment v2.0.2 followed by RNA-  
545 Seq Differential Expression version 1.0.1. The analysis used STAR for alignment and Salmon for  
546 quantification (Transcripts Per Million, TPM), followed by DESeq2 to identify differentially  
547 expressed genes. Afterward, the significantly regulated biological processes were identified by

548 GO term analysis and Gene-set enrichment analysis (GSEA).

549

550 **Chromatin Immunoprecipitation sequencing (ChIP-seq) and ChIP-qPCR Assay**

551 MEF cells were crosslinked with 1% formaldehyde at room temperature for 10 minutes. 1.5 M  
552 Glycine solution was used to terminate the fixation reaction. After washing with the iced PBS and  
553 homogenizing, cells were then lysed with SDS cell-lysis buffer (50 mM Tris pH 8.0, 1 mM EDTA  
554 pH 8.0, 0.1% wt/vol SDS, and 1 mM PMSF) for 10 min on ice, and the chromatin was sonicated  
555 to 100–500bp in a Bioruptor (Diagenode). The size of the sheared chromatin was verified by  
556 agarose gel electrophoresis after reverse crosslinking.

557

558 For immunoprecipitation, Dynabeads Protein G (Thermo, 10003D) was pre-washed with 0.5%  
559 BSA and conjugated to 5 µg of ChIP antibody or normal IgG at 4 °C for 4-6h. After washing with  
560 the RIPA/150mM NaCl washing buffer (50 mM Tris pH 8.0, 150 mM NaCl, 1 mM EDTA pH 8.0, 1%  
561 wt/vol sodium deoxycholate, 1% vol/vol Triton X-100, 0.1% wt/vol SDS and 1 mM PMSF), the  
562 conjugated beads were added to the chromatin slurry and incubated at 4 °C for 12 hours.  
563 Afterward, beads were washed twice with RIPA/150mM NaCl washing buffer, and twice with  
564 RIPA/500mM NaCl washing buffer (50 mM Tris pH 8.0, 500 mM NaCl, 1 mM EDTA pH 8.0, 1%  
565 wt/vol sodium deoxycholate, 1% vol/vol Triton X-100, 0.1% wt/vol SDS and 1 mM PMSF), four  
566 times LiCl washing buffer (10 mM Tris pH 8.0, 250 mM LiCl, 1 mM EDTA pH 8.0, 0.5% vol/vol  
567 NP-40 and 0.5% vol/vol Sodium Deoxycholate) and twice with TE buffer (10 mM Tris pH 8.0, 300  
568 mM NaCl and 0.5 mM EDTA pH 8.0). The precipitated beads were diluted with ChIP elution  
569 buffer (10 mM Tris pH 8.0, 250 mM LiCl, 1 mM EDTA pH 8.0, 0.5% vol/vol NP-40, and 0.5%  
570 wt/vol SDS). One-fourth of the solution with beads was added with SDS protein lysis buffer for  
571 WB to verify the specificity of ChIP. The rest of the ChIP'd beads and the input were reverse  
572 crosslinking with 5 M NaCl solution at 65 °C overnight.

573

574 The procedure for DNA recovery from immunoprecipitation is as follows. First, the above  
575 reversed crosslinking solution was mixed with 2x SDS lysis buffer (200 mM Tris pH 8.0, 1 M NaCl,  
576 100mM EDTA pH 8.0, and 0.5% wt/vol SDS) with Proteinase K at 200x rpm for 15 minutes and

577 followed by RNase A at 37 °C for 30 minutes. Next, 3 M NaAc (pH 5.2) was used to remove the  
578 protein. The clean supernatant was then mixed with Isopropanol and Glycogen to precipitate the  
579 DNA. After being washed twice with pre-cooled 75% ethanol, DNA pellets were dried for 10  
580 minutes, dissolved in 10 mM Tris-HCl (pH 8.0), and then measured by the Qubit dsDNA HS  
581 Assay Kit (Thermo Fisher) on the Qubit instrument (ThermoFisher Scientific). Finally, the ChIP'ed  
582 DNA proceeded for ChIP-seq or ChIP qPCR.

583

584 NEBNext Ultra II DNA Library Prep Kit for Illumina (NEB, E7645) was used for library preparation  
585 ChIP-seq was performed using the HiSeq2500 platform with paired-end 100 bases (Illumina) at  
586 the DNA sequencing core facility of the Cincinnati Children's Hospital (Cincinnati, Ohio). All  
587 sequencing data were mapped to mouse genome assembly GRCm38. Reference genome and  
588 gene model annotation files were downloaded from the genome website directly. Paired-end  
589 clean reads were aligned to the reference genome using Bowtie v2.2.6. After mapping reads to  
590 the reference genome, we used the MACS2 version 2.1.0 (model-based analysis of ChIP-seq)  
591 peak-finding algorithm to identify regions of IP enrichment over the background. A p-value  
592 threshold of enrichment of 0.01 was used for all data sets. Then, the distribution of chromosome  
593 distribution, peak width, fold enrichment, significant level, and peak summit number per peak  
594 were all displayed. For all ChIP-seq data sets, normalized bigWig files were generated by deep  
595 tools (version 3.3.2 <https://deeptools.readthedocs.io/en/develop/>), which were subsequently  
596 visualized using IGV version 2.8.13.

597

598 ChIP-qPCR was performed similarly to the ChIP-seq experiments before the library preparation.  
599 Primers for ChIP-qPCR are listed in Supplemental Table 15. Real-time PCR was conducted  
600 using the TB Green Premix Ex Taq (Takara-Bio) on the Applied Biosystems 7500 Fast Real-Time  
601 PCR System (Applied Biosystems). '% Input' was used to show the enrichment.

602

### 603 **Flow Cytometry and FACS**

604 The BM mononuclear pellets were incubated with Zombie Aqua (Biolegend, San Diego, CA) and  
605 FcR block (BD) for 10 min at 4 °C. For surface marker staining, cells were incubated with

606 fluorescence-conjugated antibodies (FITC-lin, PB-CD38, and APC-CD34) for 30-60 min at 4 °C.  
607 The lineage cocktail for human cells included antibodies against CD2, CD3, CD7, CD10, CD11b,  
608 CD14, CD19, and CD235a. The cells were fixed and permeabilized by eBioscience™  
609 FOXP3/Transcription Factor Staining Buffer set (Thermo Fisher Scientific) for intracellular  
610 staining of transcriptional factors according to the manufacturer's protocol. Then, the cells were  
611 stained with ONECUT3-PE antibody or isotype IgG-PE for 30 min. Flow cytometry was  
612 performed with a Cytoflex cytometer (Beckman Coulter, Brea, CA) and analyzed with FlowJo  
613 10.3 (TreeStar).

614

### 615 **Quantitation of mitotic cells**

616 Cells were processed for flow cytometry to quantitate the number of mitotic cells as described  
617 previously (3). Briefly, cells were fixed in pre-cold 90% methanol/10% PBS for 15min at -20°C.  
618 The PBS-washed cells were incubated with an antibody cocktail for 1 hour at 37°C. The formula  
619 of antibody cocktail: primary antibody (phospho-(Ser10)-histone H3, Abcam, ab5176, 1:100) in  
620 the buffer (PBS + 3% w/v bovine serum albumin + 0.05% Tween 20 + 0.04% Sodium Azide).  
621 Then cells were washed with PBS and incubated with the FITC-conjugated secondary antibody  
622 for 30 min at 37°C. After centrifugation, the cells were added with DNA labeling solution (0.5  
623 µg/ml propidium iodide with RNase A) and incubated for 15 minutes at 37°C. Flow cytometry was  
624 performed on a BD FACS-Canto II Flow Cytometer (BD) and analyzed with FlowJo 10.3  
625 (TreeStar).

626

### 627 **Chromosome spreads**

628 Cells were treated with 150 ng/ml (final concentration) colcemid for 2 hours at 37°C. Then the  
629 cells were digestion by the trypsin and swollen in a pre-warmed hypotonic solution (0.075 M KCl)  
630 for 20 min at 37°C. Next, cells were centrifuged at 1000 G for 7 min, followed by two rounds of  
631 fixation in ice-cold Carnoy's fixative for 10 min at room temperature. Cells were dropped on glass  
632 slides, stained in DAPI or Giemsa, dried, and scanned.

633

### 634 **Immunohistochemistry (IHC)**

635 The formalin-fixed and paraffin-embedded BM tissue from MDS patients were cut into 3  $\mu$ m thin  
636 sections. These sections were rehydrated and underwent antigen retrieval, followed by antigen  
637 blocking. They were subsequently incubated with primary anti-ONECUT3 antibody (homemade)  
638 and Aurora B (Abcam, ab2254) at 4 °C overnight and incubated with HRP-conjugated antibody  
639 against rabbit IgG with DAB as the chromogen. The whole slides were digitally scanned using  
640 Digital Pathology 5 Slides scanner (KFBIO, Ningbo, China) under 40x objective magnification.  
641 The cells were automatically separated, detected, and quantified by the QuPath v0.2.3 image  
642 analysis software (Queen's University, Northern Ireland) under the supervision of a pathologist  
643 (4). The ONECUT3 and Aurora B expression level of immunohistochemistry staining was  
644 evaluated by the staining intensity and positive cell percentage from the total slides.

645

646 **SUPPLEMENTAL REFERENCES:**

- 647 1. Lombardo A, et al. Site-specific integration and tailoring of cassette design for sustainable gene  
648 transfer. *Nat Methods*. 2011;8(10):861-869.
- 649 2. Pai MY, et al. Drug affinity responsive target stability (DARTS) for small-molecule target  
650 identification. *Methods Mol Biol*. 2015;1263:287-298.
- 651 3. Andreassen PR, et al. Neither p21WAF1 nor 14-3-3sigma prevents G2 progression to mitotic  
652 catastrophe in human colon carcinoma cells after DNA damage, but p21WAF1 induces stable G1  
653 arrest in resulting tetraploid cells. *Cancer Res*. 2001;61(20):7660-7668.
- 654 4. Bankhead P, et al. QuPath: Open source software for digital pathology image analysis. *Sci Rep*.  
655 2017;7(1):16878.

656
